1  
2  
3  
4  
5  
6  
7  
8  
9  
10  
11  
12  
13  
14  
15  
16  
17  
18  
19  
20  
21  
22

## Adaptive changes in the fungal cell wall mediate copper homeostasis

Corinna Probst<sup>1,2,3</sup>, Sarela Garcia-Santamarina<sup>2,3,#</sup>, Jacob T. Brooks<sup>4</sup>, Inge Van Der Kloet<sup>1,2,3</sup>, Dennis J. Thiele<sup>2,3,4,\*</sup>, J. Andrew Alspaugh<sup>1,2</sup>

Duke University School of Medicine, Departments of Medicine<sup>1</sup>, Molecular Genetics/Microbiology<sup>2</sup>, Pharmacology/Cancer Biology<sup>3</sup> and Biochemistry<sup>4</sup>; Durham, NC, USA

Department of Physics and Astronomy<sup>4</sup>, University of North Carolina at Chapel Hill, Chapel Hill, NC

#current address: Instituto de Tecnologia Quimica e Biologica, Universidade Nova de Lisboa, Oeiras

\*current address: Sisu Pharma, Inc. Chapel Hill, North Carolina, USA

### Corresponding Author:

J. Andrew Alspaugh  
303 Sands Research Building, Research Drive, DUMC 102359  
Duke University Medical Center, Durham, NC, USA, 27710  
[andrew.alspaugh@duke.edu](mailto:andrew.alspaugh@duke.edu)

Running title: Copper and *Cryptococcus* cell wall

Key words: *Cryptococcus neoformans*, chitin, chitosan, glucan, trace metals, chelation

23 **Abstract**

24 Copper homeostasis mechanisms are essential for microbial adaption to changing copper levels within  
25 the host during infection. In the opportunistic fungal pathogen *Cryptococcus neoformans* (*Cn*), the *Cn*  
26 Cbi1/Bim1 protein is a newly identified copper binding and release protein that is highly induced during  
27 copper limitation. Recent studies demonstrated that Cbi1 functions in copper uptake through the Ctr1  
28 copper transporter during copper limitation. However, the mechanism of Cbi1 action is unknown. The  
29 fungal cell wall is a dynamic structure primarily composed of carbohydrate polymers, such as chitin and  
30 chitosan, polymers known to strongly bind copper ions. We demonstrated that Cbi1 depletion affects cell  
31 wall integrity and architecture, connecting copper homeostasis with adaptive changes within the fungal  
32 cell wall. The *cbi1Δ* mutant strain possesses an aberrant cell wall gene transcriptional signature as well as  
33 defects in chitin and chitosan deposition. These changes are reflected in altered macrophage activation  
34 and changes in the expression of specific virulence-associated phenotypes. Furthermore, using *Cn* strains  
35 defective in chitosan biosynthesis, we demonstrated that cell wall chitosan modulates the ability of the  
36 fungal cell to withstand copper stress. In conclusion, our data suggest a dual role for the fungal cell wall,  
37 in particular the inner chitin / chitosan layer, in protection against toxic levels of copper and providing a  
38 source of metal ion availability during copper starvation. Given the previously described role for Cbi1 in  
39 copper uptake, we propose that this copper-binding protein is involved in shuttling copper from the cell  
40 wall to the copper transporter Ctr1 for regulated microbial copper uptake.

41

42 **Author summary**

43 Microorganisms must be equipped to readily acquire essential micro-nutrients like copper from  
44 nutritionally poor environments while simultaneously shielding themselves from conditions of metal  
45 excess. We explored mechanisms of microbial copper homeostasis in the human opportunistic fungal

46 pathogen *Cryptococcus neoformans* (*Cn*) by defining physiological roles of the newly described copper-  
47 binding and release protein *Cn* Cbi1/Bim1. Highly induced during copper limitation, Cbi1 has been shown  
48 to interact with the high-affinity copper transporter Ctr1. We defined Cbi1-regulated changes in the fungal  
49 cell wall, including controlling levels of the structural carbohydrates chitin and chitosan. These  
50 polysaccharides are embedded deeply in the cell wall and are known to avidly bind copper. We also  
51 defined the host immunological alterations in response to these cell wall changes. Our data suggest a  
52 model in which the fungal cell wall, especially the chito-oligomer layer, serves as a copper-binding  
53 structure to shield the cell from states of excess copper, while also serving as a copper storage site during  
54 conditions of extracellular copper depletion. Given its ability to bind and release copper, the Cbi1 protein  
55 likely shuttles copper from the cell wall to copper transporters for regulated copper acquisition.

56

## 57 **Introduction**

58 Metal ions serve important and varied roles in the host-pathogen interaction. Transition metals,  
59 such as copper and iron, are essential micronutrients for both the host and pathogen, required as co-  
60 factors for cellular respiration and other central cell processes [1, 2]. However, non-bound metal ions can  
61 be very cytotoxic. The requirement that microbial cells have ready access to non-toxic levels of transition  
62 metals governs a host process called “nutritional immunity”. In this process, the host starves invading  
63 microbial pathogens by sequestering essential metals under certain conditions. Conversely, the host may  
64 actively bombard the pathogen with toxic levels of metals in other conditions. Nutritional immunity is best  
65 studied within microbe-containing macrophages in which Mn, Fe, and Zn are typically restricted by the  
66 host, while toxic levels of Cu are actively transported into the phagolysosome by the ATP7A copper pump  
67 [3].

68           The genes that control copper homeostasis in fungi are under tight transcriptional control in  
69 response to extracellular copper concentrations. In contrast to many other fungi, the human fungal  
70 pathogen *Cryptococcus neoformans* (*Cn*) has a single transcription factor, Cuf1, that regulates the  
71 transcriptional response to both copper excess and copper starvation [4]. Within the Cuf1 regulon, one of  
72 the most highly induced genes during copper starvation is *Cn CBI1/BIM1* (CNAG\_02775), encoding a GPI-  
73 anchored protein that interacts with the Ctr1 high-affinity Cu<sup>+</sup> transporter. The *Cn* Cbi1 copper binding  
74 and release protein, previously named Bim1, is required for growth in low copper conditions and therefore  
75 for effective brain colonization by this neuropathogenic yeast [5]. Cbi1 shares limited homology with lytic  
76 polysaccharide monooxygenase (LPMO) proteins that cleave glycosidic bonds within complex  
77 carbohydrates such as cellulose, starch, and chitin . Also similar to LPMOs and copper chaperones, *Cn*  
78 Cbi1/Bim1 binds copper in a histidine brace region, and it releases copper in response to low levels of  
79 hydrogen peroxide. However, the purified *Cn* Cbi1/Bim1 protein does not possess the redox activity  
80 associated with most sugar-modifying enzymes [6, 7]. It also lacks recognizable polysaccharide binding  
81 sites present in LPMOs [6, 7]. Its specific function in Ctr1-mediated uptake of copper is therefore unclear.  
82 Based upon previous data, it has been proposed that *Cn* Cbi1/Bim1 acts as an intermediary copper binding  
83 protein, delivering copper to Ctr1 for cellular copper acquisition. However, the details of this activity and  
84 the source of the copper bound by *Cn* Cbi1/Bim1 are not yet defined [5].

85           The *Cryptococcus* cell wall is a dynamic structure at the interface between the fungus and its  
86 external environment. The basal layer of fungal cell walls is composed primarily of chito-oligomers such  
87 as chitin and chitosan, which form a highly cross-linked and rigid structure near the plasma membrane.  
88 More superficial layers include other carbohydrates such as  $\alpha$ - and  $\beta$ -glucans, as well as mannosylated  
89 proteins [8]. During infection and other periods of cell stress, *Cryptococcus* species remodel the cell wall  
90 to promote microbial survival under changing environmental conditions. During infection, these adaptive  
91 cell wall changes include facilitating the incorporation of the antioxidant pigment melanin, promoting the

92 attachment of an antiphagocytic capsule, and masking immunogenic cell wall epitopes to avoid immune  
93 recognition [9-12]. Several host-relevant signals are required for the induction of this type of fungal cell  
94 wall remodeling, including host temperature and the relatively alkaline pH encountered during infection  
95 [9, 13]. However, it is not well understood how metal stress and nutritional immunity responses affect  
96 the fungal cell wall, or if the fungus actively remodels its cell surface in response to those stresses.

97 Components of fungal cell walls, especially chitin and chitosan, have been previously  
98 demonstrated to effectively chelate environmental divalent metal ions such as  $\text{Cu}^{2+}$  [14, 15] but the  
99 physiological importance to the microbe of metal chelation by the fungal cell wall is poorly understood.  
100 To further explore the interaction between copper homeostasis and the fungal cell wall, we analyzed the  
101 cell wall remodelling response in the *cbi1* $\Delta$  mutant strain, which is defective in a cell surface protein  
102 involved in copper homeostasis. We first characterized the role of Cbi1 in the transcriptional signatures  
103 of *Cn* cell wall-regulating genes. We also defined the physiological effects of mutations in proteins involved  
104 in copper homeostasis on the composition and integrity of the cell wall. Since the *Cn* cell wall controls  
105 macrophage activation, we determined how copper acquisition and homeostasis affect host innate  
106 immune recognition signals as well as the expression of specific microbial phenotypes associated with  
107 virulence. These studies suggest that copper availability affects the architecture and integrity of the fungal  
108 cell wall; processes likely required for microbial adaptation to host-like nutritional environments. Based  
109 upon our data we propose a dual role for the fungal cell wall in protecting *C. neformans* against the  
110 presence of toxic levels of copper and providing a source of metal ion availability during copper starvation.

111

112 **Results**

113 **The transcription factor Cuf1 regulates cell wall integrity in response to cellular copper levels through**  
114 **the Cbi1-Ctr1 copper uptake complex**

115 A recent study identified the *C. neoformans* Cuf1-dependent copper regulon in response to both  
116 copper deficiency and copper excess [4]. During copper deficiency, the most upregulated Cuf1-dependent  
117 transcripts represent genes involved in copper uptake, including those encoding for the high-affinity  
118 copper transporters Ctr1 and Ctr4 and the newly identified Cbi1 protein [4]. Previously referred to as *Cn*  
119 Bim1, this protein has been renamed Cbi1 to reflect its known biochemical activities [6, 7], and to  
120 recognize the previously described *Cn* Bim1 microtubule-binding protein involved in filamentous growth  
121 [16]. Other *Cn* Cuf1- and copper-regulated genes include many involved in cell wall synthesis and  
122 carbohydrate metabolism, potentially connecting copper homeostasis with cell wall remodeling [4, 5].

123 In pathogens, the fungal cell wall is a dynamic structure required for viability, stress resistance,  
124 morphogenesis and virulence. Its composition is actively remodeled in response to various stress signals,  
125 and this process is controlled by conserved signaling cascades, including the cell wall integrity (CWI)  
126 pathway [17]. The cell wall stress experienced by the copper homeostasis mutants, specifically during  
127 copper deprivation, is reflected in transcriptional alterations in the CWI pathway. The *ROM2* gene encodes  
128 a guanine nucleotide exchange factor required for CWI pathway activation under conditions of cell stress  
129 [18]. Transcriptional induction of *ROM2* is therefore typically observed during conditions of cell wall stress.  
130 Comparative transcriptional analysis of the WT and *cuf1Δ* mutant revealed similar *ROM2* transcript levels  
131 during copper sufficiency. In contrast, *ROM2* transcript levels were 3-fold higher in the *cuf1Δ* strain  
132 compared to wildtype during copper starvation, consistent with an accentuated sensing of cell wall stress  
133 in this strain in this condition. Complementation of the *cuf1Δ* mutant with the *CUF1-FLAG* gene (*cuf1Δ<sup>C</sup>*  
134 strain) restored *ROM2* transcript to wildtype levels (Fig 1B).

135 To further analyze the impact of *CUF1* and other copper homeostasis genes for maintaining cell  
136 wall integrity during copper deficiency, we assessed the sensitivity of the *cuf1Δ*, *cbi1Δ*, *ctr1Δ* and *ctr4Δ*  
137 strains to cell wall stressors in copper-replete and copper-deficient conditions. These stresses included  
138 calcofluor white (CFW, blocks chitin assembly), Congo red (impairs assembly of cell wall polymers, mainly  
139 chitin), caffeine (impacts PKA-mediated signal transduction), SDS (cell surface/ membrane stressor) and  
140 NaCl (osmotic stressor) [19-21]. We did not observe any growth phenotypes for the mutant strains in the  
141 presence of these cell wall stressors under copper-replete conditions (Supp Fig 1A). In contrast, during  
142 copper starvation induced by the extracellular copper (I) chelator bathocuproinedisulfonic acid (BCS)  
143 (100μM), the *cuf1Δ* and *cbi1Δ* strains exhibited strong growth inhibition compared to WT on NaCl, SDS,  
144 Congo red and CFW-containing media (Fig 1B). Even at more modest levels of copper chelation (10μM  
145 BCS), the *cuf1Δ* and *cbi1Δ* strains exhibited strong growth inhibition on Congo red-containing media (Fig.  
146 1C). Additionally, the Ctr1 copper transporter was similarly required for survival during copper deprivation  
147 in the presence of NaCl and CFW, but not in the presence of SDS. No cell wall stress-associated growth  
148 defect was noted for the *ctr4Δ* copper transporter mutant strain (Fig 1B), supporting prior observations  
149 that the Ctr1 and Ctr4 high affinity copper transporters serve overlapping but non-redundant functions in  
150 *Cn* copper homeostasis [22]. Growth inhibition of the *cuf1Δ* and *cbi1Δ* strains was complemented by  
151 expressing epitope-tagged versions of these proteins in the respective mutant strains [Cuf1-Flag in *cuf1Δ*  
152 (*cuf1Δ<sup>C</sup>*) or Cbi1-HA in *cbi1Δ* (*cbi1Δ<sup>C-WT-HA</sup>*)]. Together, these results suggest that copper homeostasis is  
153 required for *Cn* cell wall stress resistance.

154 To further explore the relationships among the *Cn* copper homeostasis proteins in cell wall  
155 integrity, especially the less well-characterized Cbi1 protein, we conditionally overexpressed the *CBI1*  
156 gene in a series of individual and double mutant strains (Fig 1C). Galactose-mediated overexpression of  
157 the pGAL7-*CBI1* allele fully complemented the copper-dependent cell wall growth defect of the *cbi1Δ*  
158 mutant, and partially that of the *cuf1Δ* strain. In contrast, overexpression of *CBI1* was unable to restore

159 cell wall integrity to strains with a *ctr1* $\Delta$  mutation. These results are consistent with prior studies  
160 suggesting that Cbi1 and Ctr1 are independent components of a copper transporter complex [5].  
161 Additionally, these findings indicate that defective Cbi1 function is likely responsible for much of the loss  
162 of cell wall integrity in the *cuf1* $\Delta$  mutant.

163 We also assessed *Cn* copper-dependent cell wall integrity phenotypes using an alternative  
164 method of copper limitation to extracellular copper chelation by BCS. We incubated the *Cn* strains in  
165 media containing ethanol and glycerol as sole carbon sources. Growth on these non-fermentable  
166 carbohydrates is only supported by cellular respiration, effectively shunting intracellular copper into the  
167 mitochondria to the copper-dependent enzymes required for oxidative phosphorylation. Incubation of  
168 the WT and *cbi1* $\Delta^{C-WT}$  strains in YPEG + 0.01% SDS caused a ~40% growth reduction, and an even more  
169 severe reduction of growth (~90%) in the *cbi1* $\Delta$  strain (Fig 1D). This growth impairment was  
170 complemented in all strains by supplementation with CuSO<sub>4</sub>, suggesting that shuttling of copper from  
171 other pathways towards respiration influences the ability of *Cn* to withstand cell surface stress. Depletion  
172 of Cbi1 further decreased cell fitness under these conditions.

173 We also tested the cell wall integrity of the *Cn ccc2* $\Delta$  mutant, a strain defective in copper transport  
174 within the secretory pathway and subsequent altered metalation of secreted proteins [2, 23]. A modest  
175 growth defect on Congo red was observed for the *ccc2* $\Delta$  strain, and the defect developed independent of  
176 copper availability (Fig. 1E). These results suggest that defective copper loading of enzymes in the  
177 secretory compartment is likely not the cause of the *Cn* cell wall phenotypes observed during copper  
178 deficiency.

179 The Cfo1 ferroxidase is a copper-dependent enzyme involved in high-affinity iron acquisition [24].  
180 Therefore, loss-of-function mutations in Cuf1 or other components of the *Cn* copper uptake machinery  
181 would be predicted to affect intracellular iron concentrations as well as copper levels. Additionally,



182 previous studies demonstrated that iron homeostasis is important for proper fungal cell wall and  
183 membrane architecture [25, 26]. We therefore analyzed the effects of exogenous copper or iron on the  
184 BCS-induced cell wall phenotypes of the *cbi1Δ* and *cuf1Δ* mutants. Individual supplementation of the  
185 growth medium with copper, but not iron, restored growth to the *cbi1Δ* and *cuf1Δ* strains in the presence  
186 of cell wall stress and copper depletion (Fig 1F).

### 187 **Changes in *Cn* cell wall composition in response to defective copper homeostasis**

188 To further characterize the specific role of Cbi1 in cell wall homeostasis during copper stress, we  
189 used transmission electron microscopy (TEM) to characterize the cell wall architecture of the wildtype  
190 (WT) and *cbi1Δ* strains incubated in both copper-sufficient and copper-deficient growth conditions (Fig 2).  
191 In copper-sufficient conditions the *Cn* WT cell wall consists of two layers characterized by differing  
192 electron density [27-29]. Extracellular copper sequestration by the highly copper-specific chelator BCS  
193 resulted in decreased electron density in the innermost cell wall layer composed primarily of chitin and  
194 chitosan (Fig 2 A, C). These chito-oligomers efficiently bind bivalent metals (including copper ions),  
195 consistent with the higher electron density of this cell wall layer during copper sufficiency [14, 15]. The  
196 cell wall of the *cbi1Δ* mutant strain was similar to WT during copper sufficiency, displaying distinct layers  
197 based on electron density. However, the copper-starved *cbi1Δ* strain demonstrated a reduction in total  
198 cell wall thickness compared to both the WT strain and the copper-sufficient *cbi1Δ* cells (Fig 2B). Also in  
199 contrast to WT, there was no reduction in the inner cell wall electron density in the *cbi1Δ* mutant strains  
200 during copper deficiency (Fig 2A, C). These results suggest a model in which Cbi1 is required for the release  
201 of cell wall-bound metals during copper starvation.

202 The ultrastructural changes observed in the *cbi1Δ* strain cell wall during copper starvation were  
203 not due to altered cell viability. Although the *cbi1Δ* strain demonstrated a defect in proliferation during  
204 copper deficiency, we observed no decrease in *cbi1Δ* cell viability during the first 24 hours, as assessed by

205 quantitative cultures of colony-forming units (CFUs) (Supp Fig 1 B-C). We also assessed the effective  
206 “copper state” of the WT and *cbi1Δ* strains in the conditions chosen for copper sufficiency (10μM CuSO<sub>4</sub>)  
207 and deficiency (250μM BCS) by quantifying transcript levels of the *CMT1* metallothionein gene (induced  
208 during high copper states) and the *CTR4* copper transporter gene (induced during copper starvation)  
209 (Supp Fig 1D). Both the WT and *cbi1Δ* strains demonstrated a strong induction of *CTR4* expression, but  
210 not of the *CMT1* transcript, indicating that copper deficiency was induced by BCS treatment compared to  
211 the copper sufficient growth conditions. We also performed ICP-MS-based metal quantification of cell-  
212 associated copper and iron in each growth condition (Supp Fig 1 E-F). A consistent and similar pattern of  
213 reduced cell-associated Cu was measured in the WT and *cbi1Δ* cells cells incubated in BCS. Additionally, a  
214 decrease in iron levels was observed in copper-deficient cells, consistent with known copper-dependent  
215 iron uptake mechanisms in *Cn*.

#### 216 **Transcriptional changes in cell wall genes in response to copper status**

217 Prior investigations have established a set of *C. neoformans* genes encoding enzymes involved in  
218 the synthesis and chemical modification of the major cell wall structural carbohydrates. These include 8  
219 chitin synthetase genes (*CHS1-8*), 4 chitin deacetylase genes (chitin-to-chitosan conversion) (*CDA1-3*,  
220 *FPD1*), and the chitin synthase regulator-2 (*CSR2*). Genes involved in glucan synthesis include *KRE6* and  
221 *SKN1* (β-1,6-glucan), *FKS1* (β-1,3-glucan) and *AGS1* (α-1,3-glucan) [8]. To investigate how copper  
222 availability and Cbi1 might affect cell wall carbohydrate homeostasis, we measured transcript levels of  
223 these major cell wall synthesis genes in copper deficient wildtype (WT), *cbi1Δ* mutant, and *cbi1Δ*<sup>C-WT</sup>  
224 complemented strain (Fig 2 D-E). Among the genes involved in chitin and chitosan synthesis, we observed  
225 significant increases in transcript abundance in the *cbi1Δ* mutant for *CHS6* (~7 fold), *CHS3* (~4 fold) and  
226 *CSR2* (~3 fold), while the chitin/chitosan deacetylase genes *CDA2* and *FPD1* were downregulated (Fig 2D).  
227 In addition to genes involved in chitin/chitosan biosynthesis, the transcript level of the β-1,3-glucan

228 synthase *FKS1* gene was induced 8-fold. Changes in the expression of *KRE6* ( $\beta$ -1,6-glucan synthesis) and  
229 *AGS1* ( $\alpha$ -1,3-glucan synthesis) were not statistically significantly altered (Fig 2E). Taken together, these  
230 findings indicate that the copper-deficient *cbi1Δ* strain displays transcriptional changes in several cell wall  
231 polysaccharide synthesis genes, especially those associated with chitosan and  $\beta$ -1,3-glucan synthesis.

232 To explore the functional relevance of changes in *Cn* cell wall gene transcript abundance as a  
233 function of copper availability, we quantified  $\beta$ -glucan and chitin/chitosan levels in the WT, *cbi1Δ* mutant,  
234 and *cbi1Δ<sup>C-WT</sup>* complemented strains after incubation for 24h in copper-sufficient (YPD + 10  $\mu$ M CuSO<sub>4</sub>)  
235 and copper-deficient (YPD + 250  $\mu$ M BCS) conditions. No significant changes were detected in total cell  
236 wall  $\beta$ -glucan between the WT and *cbi1Δ* cells in either growth condition (Supp Fig 2A). However, the  
237 *cbi1Δ* mutant exposed to copper-deficiency displayed a greater than 50% reduction in total cell wall chitin  
238 and in chitosan compared to WT and complemented strains (Fig 3 A-B). These results are consistent with  
239 reduced transcript levels for the *CDA2* and *FPD1* chitin deacetylase genes in the copper-starved *cbi1Δ*  
240 strain. Therefore, the reduction of cell wall thickness and altered cell wall integrity in the *cbi1Δ* strain  
241 during copper starvation is, in part, likely due to a reduction in the inner cell wall chito-oligomer layer.

242 To examine detailed changes in patterns of chitin and chitosan deposition, we performed  
243 microscopy using chitin- and chitosan-specific fluorescent stains. We double-stained Cu-sufficient and Cu-  
244 deficient WT, *cbi1Δ* and *cbi1Δ<sup>C-WT</sup>* cells with Calcofluor white (CFW), a small molecule globally staining  
245 chitin, and AlexaFluor488-conjugated wheat germ agglutinin (WGA-Alexa 488), a lectin that binds exposed  
246 chito-oligomers. To a similar extent as in the biochemical chitin assays, we observed a reduction in CFW  
247 staining intensity of Cu-deficient *cbi1Δ* cells (Fig 3 C, Supp Fig 2B). WGA staining of WT and *cbi1Δ<sup>C-WT</sup>*  
248 complemented cells only revealed exposed chito-oligomers, primarily at regions of cell separation,  
249 budding sites, and bud scars (Fig 3 C). In contrast, the copper-deficient *cbi1Δ* cells demonstrated an  
250 enrichment of WGA-Alexa 488 staining globally around the cell surface. We additionally stained cells with  
251 EosinY, a small molecule that binds to chitosan polymers. Consistent with the biochemical data indicating

252 reduced chitosan levels, we observed decreased EosinY staining intensity in copper-starved *cbi1Δ* cells  
253 (Fig 3D, Supp Fig 2 C-D).

254 We also performed flow cytometry on CFW and WGA-Alexa 488 stained cells to more precisely  
255 quantify the altered chito-oligomer staining pattern in these strains (Fig 3 E-H, Supp Fig 2 E-F). We directly  
256 compared WGA-Alexa 488 staining intensity to CFW staining intensity to assess chito-oligomer exposure  
257 relative to total cell wall chito-oligomer content. In copper-sufficient growth conditions, there was a small  
258 but statistically significant decrease in WGA-Alexa 488 staining intensity among the *cbi1Δ* cells compared  
259 to WT and complemented strains. However, we observed a notable increase in relative WGA staining in a  
260 sizable subpopulation of *cbi1Δ* cells (“High WGA”, Fig 3 G-H, Supp Fig 2E) during copper-starvation,  
261 consistent with the fluorescent microscopy results. Together, these findings suggest that the cell wall  
262 chito-oligomers of copper-deficient *cbi1Δ* cells are not only decreased in total amount, but they are  
263 deposited within the cell wall in an aberrant manner, leading to a higher degree of exposure.

264 To explore the role of chitin and chitosan for modulating the resistance to copper stress, we  
265 assessed the growth effects during low and high copper stress for strains with mutations in either copper  
266 homeostasis or chitosan synthesis (Fig 4). As previously described, we observed poor growth of the *cbi1Δ*  
267 and *ctr1Δ* strains during copper deficiency (Fig 4B). In line with previous findings, no sensitivity to copper  
268 starvation was observed for the *ctr4Δ* copper transporter mutant strain [30]. These results indicate that  
269 the Cbi1/Ctr1 complex can likely compensate for the loss of Ctr4, but that the Ctr4 transporter is not  
270 sufficient to maintain *Cn* growth during copper starvation in the absence of Ctr1. A slight reduction in  
271 growth was observed for the *chs3Δ* strain during copper starvation. Since Chs3 is responsible for the  
272 synthesis of most of the chitin destined to be converted to chitosan, this result suggests that reductions  
273 in chitosan may affect the ability of *Cn* to withstand low copper stress. No growth phenotype was  
274 observed for the *cda2Δ* chitin deacetylase gene, indicating that the observed dysregulation of *CDA2* in the  
275 *cbi1Δ* background does not explain the *cbi1Δ* growth defect during copper deficiency.

276 To assess the role of the chitin and chitosan inner layer on resistance to copper toxicity, we tested  
277 the *chs3Δ* and *cda2Δ* mutant strains for growth phenotypes in the presence of increasing copper  
278 concentrations. The chitosan-deficient *chs3Δ* strain was more sensitive to high copper stress than the wild-  
279 type, and similar in its copper sensitivity to strains with mutations in the *Cn* metallothionein genes *CMT1*  
280 and *CMT2* that mediate scavenging of excess copper (Fig 4C). In contrast to *chs3Δ*, the *cda2Δ* strain, with  
281 a mutation in a single chitin deacetylase gene but relatively preserved cell wall chitosan levels,  
282 demonstrated resistance to toxic copper levels compared to WT. The *cbi1Δ* mutant displayed a similar  
283 copper resistance profile as the *cda2Δ* strain. This increased copper resistance was not shared with the  
284 *ctr1Δ* or *ctr4Δ* copper transporter mutants, suggesting that altered copper transport was not responsible  
285 for this phenotype. This finding suggests an unexpected new role for Cbi1 in modulating growth during  
286 high copper stress, potentially by its known role in modulating *CDA2* function.

287

### 288 **Cell wall changes in response to low copper stress lead to increased macrophage activation and altered** 289 **casprofungin tolerance**

290 We tested the physiological relevance of altered copper homeostasis to other infection-related  
291 processes involving the cell wall. *C. neoformans* strains with enhanced exposure of cell wall chito-  
292 oligomers often display increased activation of host innate immune cell activity [31, 32]. To investigate  
293 the physiological consequences of the aberrant *cbi1Δ* cell wall structure in host cell interactions, we co-  
294 incubated *C. neoformans* strains with murine bone marrow-derived macrophages (BMM), assessing TNF- $\alpha$   
295 production as a marker of host immune cell activation. Macrophages exposed to copper-deficient *cbi1Δ*  
296 cells showed a statistically significant increase in TNF- $\alpha$  secretion compared to macrophages co-incubated  
297 with similarly treated WT or complemented strains (Fig 5A). No differences in TNF- $\alpha$  production were  
298 noted for macrophages incubated with any of these strains grown in the presence of copper.

299           Compared to many fungal pathogens, *C. neoformans* is relatively tolerant to caspofungin, an  
300 antifungal drug that inhibits  $\beta$ -glucan synthesis. However, *C. neoformans* strains with defects in chitosan  
301 production are more susceptible to this drug [33]. This observation is consistent with a conserved  
302 compensatory increase in cell wall chitin and chitosan among diverse fungi upon treatment with  
303 caspofungin [34, 35]. Given the reduced cell wall chito-oligomer content in the copper-starved *cbi1 $\Delta$*   
304 mutant, we hypothesized that this strain would be more susceptible to caspofungin. Consistent with this  
305 hypothesis, we observed a greater than five-fold decrease in the minimal inhibitory concentration (MIC)  
306 of caspofungin for the *cbi1 $\Delta$*  mutant strain compared to the WT and reconstituted strains when incubated  
307 in copper-deficient conditions (MIC<sub>50</sub> *cbi1 $\Delta$*  3.1  $\mu$ M) (Fig 5B, Supp Fig 2G). Together these results suggest  
308 that the fungal cell wall mediates durable and adaptive cellular responses to copper availability that affect  
309 host cell interactions and antifungal drug activity.

310

### 311 **Depletion of Cbi1 affects several cell wall-associated virulence factors.**

312           The *Cryptococcus* cell wall is not only important for stress resistance and modulating immune  
313 response but also for several well-established virulence factors such as melanization and capsule  
314 formation. The cryptococcal capsule is composed of highly branching polysaccharides that are covalently  
315 attached to components of the outer surface of the cell wall, especially  $\alpha$ -1,3 glucans [36]. The thickness  
316 of the capsule is induced during incubation conditions that mimic the host environment, including slightly  
317 alkaline pH and micronutrient limitation [11]. Strains with mutations in several chitin deacetylase genes,  
318 in particular with a *cda2* deletion, typically display enlarged capsules [21]. Similarly, the *cbi1 $\Delta$*  mutant, in  
319 which *CDA2* levels are reduced, produced more surface capsule, especially in copper limiting conditions  
320 (Fig 5D-E).

321 We performed scanning electron microscopic (SEM) analysis of WT and *cbi1Δ* cells after 3d of  
322 capsule induction in the absence and presence of 250 μM BCS (Fig 5F) to further analyze the role of Cbi1  
323 in capsule architecture with a higher topographical resolution. Similar to capsule assessment by India ink  
324 counterstaining, we observed the most notable alterations in the capsular structure of the *cbi1Δ* strain  
325 during copper limitation. Under normal capsule-inducing conditions both strains showed typical capsule  
326 architecture with a more dense inner zone and a less dense outer layer with extended capsule fibers [36].  
327 However, when copper deficiency was induced by BCS supplementation, the *cbi1Δ* capsule displayed  
328 denser and more interconnected polysaccharide fibers compared to WT, with fewer freely extending  
329 individual capsule fibers.

330 Both copper limitation and cell wall alterations are important for the regulation of melanin, a cell  
331 wall-associated antioxidant pigment [23, 29]. Melanin production itself is tightly linked to cellular copper  
332 levels since the rate-limiting phenoloxidase enzyme involved in melanin synthesis, laccase-1 (*Cn Lac1*), is  
333 functionally dependent on copper [37]. The *cbi1Δ* strain displayed defective melanin production on L-  
334 DOPA containing media (Fig 5C). The restoration of normal melanin production by the addition of 5 μM  
335 CuSO<sub>4</sub> is consistent with the known defects in copper acquisition in this strain [5]. We did not observe  
336 altered melanin production for the *ctr1Δ* or *ctr4Δ* strains, suggesting that the degree of intracellular  
337 copper limitation is greater in the absence of of the Cbi1 protein than in either of the single copper  
338 transporter mutants. Also, chitosan is required for the attachment of melanin to the cell surface and  
339 strains completely lacking chitosan display a “leaky melanin phenotype” in which melanin diffuses from  
340 the cell into the growth medium [21]. Even though depletion of Cbi1 affects cell wall chitosan levels during  
341 copper deficiency, we did not observe a leaky melanin phenotype. This is consistent with a reduction but  
342 not the complete absence of chitosan in the *cbi1Δ* strain. Together these results suggest that Cbi1-  
343 mediated cell wall remodeling and copper homeostasis affect the establishment of several cell wall-  
344 associated virulence factors.

346 **Discussion**

347           In these experiments we demonstrated that copper deficiency, and either deletion of the Cuf1  
348 transcription factor or the copper-binding Cbi1 cell surface protein, renders *C. neoformans* more  
349 susceptible to cell wall stress. This central result suggests that copper homeostasis mechanisms affect the  
350 integrity of the fungal cell wall. In turn, we demonstrated that genes involved in cell wall chitosan  
351 biosynthesis modulate resistance to copper stress. Furthermore, we characterized the biochemical and  
352 physiological changes that occur in the cryptococcal cell wall in response to low copper availability. These  
353 changes include a reduction in the amount of chitin and chitosan, two structurally related carbohydrates  
354 that are typically deeply embedded in the cell wall. Other cell wall-associated processes that were also  
355 altered in the *cbi1* mutant include an increased accumulation of surface capsule and a reduction in  
356 melanin, two mediators of virulence in this human fungal pathogen. Given the established role of the *Cn*  
357 cell surface to mediate immune avoidance, we documented altered interaction of the *cbi1*Δ mutant with  
358 macrophages, indicating that these cell wall changes influence the ways in which *Cn* interacts with host  
359 innate immune cells.

360           Copper regulation by the infected host is an important mechanism of immune response to  
361 invading pathogens. In contrast to the well-described “nutritional immunity” that primarily involves the  
362 sequestering of other essential micronutrients such as iron and zinc away from infecting microorganisms,  
363 the host regulation of copper involves a complex coordination of copper sequestration in certain tissues and  
364 the induction of very high copper levels in other sites [3, 22, 38, 39]. In this way, microbial pathogens must  
365 be able to acquire sufficient copper for cell metabolism and energy production while simultaneously  
366 preventing the harmful effects of host-induced copper toxicity. In *C. neoformans*, the Cuf1 transcription  
367 factor controls this cellular response to both low and high copper concentrations [2, 4]. In contrast, many  
368 other fungal species, both pathogens and nonpathogens, utilize distinct transcriptional regulators for each  
369 of these copper states. A genome-wide analysis identified many new and novel copper- and Cuf1-



370 regulated genes, likely reflecting the wide range of copper concentrations encountered by this fungal  
371 pathogen in its varied environmental niches [4].

372 In response to high copper stress, microorganisms have developed multiple means of copper  
373 detoxification, including copper efflux systems as well as the induction of the copper-binding  
374 metallothionein proteins [2, 39]. In *C. neoformans*, expression of the *CMT1* and *CMT2* metallothionein  
375 genes is controlled by Cuf1 in response to elevated copper levels, and these genes are required for fungal  
376 survival at sites of high copper exposure such as the host lung tissue [38]. Another reported defense  
377 mechanism against the effects caused by high copper stress is the up-regulation of the *ATM1* gene,  
378 required for transport of a Fe-S precursor into the cytosol to protect cytosolic Fe-S cluster proteins from  
379 mis-metalation caused by unbound free Cu<sup>+</sup> ions [40]. Recent reports have also demonstrated *Cn*  
380 proteomic responses to copper toxicity, including inhibition of protein translation and the induction of  
381 ubiquitin-mediated protein degradation [41]. Additionally, metabolic profiling of *Cn* during high copper  
382 stress demonstrated large changes in carbohydrate and amino acid metabolites [42]. In this study, we  
383 observed that the *CBI1* and *CDA2* genes, which are both regulated by Cuf1, are required for adaptive cell  
384 wall remodelling in response to copper stress, specifically by altering the cell wall chitin/chitosan layer.

385 Despite its toxicity, copper is essential for critical cellular processes, serving as a catalytic cofactor  
386 that drives iron uptake and distribution, mitochondrial cytochrome oxidase activity, and reactive oxygen  
387 (ROS) detoxification through the Cu/Zn superoxide dismutase (Sod1) [2]. Therefore, in response to low  
388 copper stress, microbes have evolved strategies to increase copper uptake efficiency and to direct copper  
389 to sites where it is most needed [2, 43, 44]. In *C. neoformans*, increased expression of the copper importer  
390 genes *CTR1* and *CTR4* and the *CBI1* gene represents an early response to copper limitation, and is  
391 important for fungal survival at sites of copper limitation [4, 5, 22, 30]. A recent study demonstrated  
392 another copper sparing mechanism used by *C. neoformans* to adapt to copper limitation in which Cuf1  
393 directs the transcriptional down-regulation of the copper-dependent superoxide dismutase *SOD1* gene

394 and the simultaneous re-localization of the copper-independent Sod2 protein to maintain cellular  
395 antioxidant defense levels during copper limitation [45].

396         Based on our findings we suggest a model in which the fungal cell wall serves two functions  
397 relevant to copper homeostasis. First, under conditions of copper excess, cell wall carbohydrates bind  
398 copper ions to prevent cytotoxic copper stress. Second, under conditions of copper deficiency, the cell  
399 wall releases bound copper to metal transporters for maintenance of cell homeostasis. Our data also  
400 suggest that the Cbi1 protein is one component of this copper acquisition process between the Ctr1  
401 copper transporter and the fungal cell wall. *CB11* and *CTR1* are among the *Cn* genes with the highest  
402 degree of regulation by the copper-sensing Cuf1 transcription factor in conditions of Cu depletion [4, 5].  
403 The Cbi1 and Ctr1 proteins interact both physically and genetically [5]. Accordingly, the *cbi1Δ* and *ctr1Δ*  
404 mutants display some similar phenotypes: poor growth in the presence of copper deprivation and cell wall  
405 stress.

406         However, the Cbi1 protein appears to have functions that are independent of simply participating  
407 in Ctr1-mediated copper transport into the cell. The *cbi1Δ* strain has a more severe, but copper-  
408 remediable, melanin production defect than the *ctr1Δ* strain, suggesting a greater degree of intracellular  
409 copper limitation or altered copper acquisition. Moreover, only the *cbi1Δ* mutant, and not the *ctr1Δ* or  
410 *ctr4Δ* copper transporter mutants, displayed enhanced resistance to toxic copper levels. These results  
411 begin to elucidate a new role for cell wall polysaccharides in adaptation to environmental changes. Since  
412 cell wall polysaccharides such as chitin and chitosan are known to avidly bind divalent metal ions such as  
413  $\text{Cu}^{2+}$ , it is likely that their presence in the fungal cell wall serves to similarly bind copper encountered in  
414 the environment. At lower levels of copper exposure, cell wall-associated copper might provide a readily  
415 accessible storage site for the copper transporter complexes. At higher levels of copper, polymers such as

416 chitosan might bind copper, protecting the cell body and membranes against the toxic effects of free  $\text{Cu}^{2+}$   
417 ions.

418         The Cbi1 protein displays some degree of sequence similarity to proteins such as LPMOs that bind  
419 complex carbohydrate surfaces and promote further structural alterations by specific hydrolases [46].  
420 LPMOs have been best explored in the context of degradation of crystalline cellulose and chitin [47]. We  
421 have previously demonstrated that Cbi1 binds copper, but it lacks the redox activity that defines the LPMO  
422 class of enzymes [5, 6]. Its copper-binding activity, and its physical association with the Ctr1 protein,  
423 suggest that Cbi1 might act as an intermediary to shuttle copper from the cell wall storage sites to the  
424 copper importer system. Our TEM data here support this model. In these images the electron density of  
425 the chitin/chitosan cell wall layer remains unchanged in the *cbi1Δ* mutant during extracellular copper  
426 starvation. In contrast, the electron density of this layer in WT cells decreases during copper starvation,  
427 consistent with enhanced cellular import of this metal ion mediated in part by Cbi1.

428         Here we have demonstrated that the absence of Cbi1 is also associated with transcriptional  
429 changes in cell wall genes, and that these transcriptional changes result in functional consequences for  
430 the *Cn* cell wall. These changes include reduced levels of chitin and chitosan as well as altered cell wall  
431 architecture, especially in the presence of copper limitation. As a result, cell wall-associated virulence  
432 factors are altered in function, resulting in changes in the interaction with host immune cells. The specific  
433 activity of the Cbi1 protein has yet to be determined. Also, it is not yet clear whether the cell wall changes  
434 in the *cbi1Δ* strain are directly related to Cbi1 function or whether they represent compensatory cellular  
435 changes in response to stress. This type of cell wall adaptation to cell stress is commonly observed in other  
436 conditions [48]. For example, cell wall chitin levels are increased in the human fungal pathogens  
437 *Aspergillus fumigatus* and *C. neoformans* during treatment with the beta-glucan synthase inhibitor  
438 capofungin [33]. Blunting this adaptive cell wall chitin response renders these cell more susceptible to the

439 activity of this antifungal agent. Similarly, we demonstrated here that the *cbi1Δ* mutation, and its  
440 downstream defective chitin response, results in a similar degree of enhanced caspofungin susceptibility  
441 as mutation in chitin synthesis genes themselves.

442 Our observations of significant reductions in cell wall chitosan in the copper-starved *cbi1Δ* strain  
443 also suggest that this cell wall polymer may contribute to copper homeostasis. In contrast to many  
444 ascomycete fungal pathogens, *C. neoformans* contains much more chitosan in the inner chito-oligomer  
445 layers of the cell wall [8]. Chitosan is a relatively de-acetylated form of chitin. Both chitin and chitosan  
446 exist in varying sizes, the polymer length determined by both endogenous and exogenous synthases and  
447 chitinases. In fact, the size of the chitin and chitosan molecules, as well as their relative degrees of  
448 acetylation/deacetylation, determine their immunogenicity. Therefore, both host and microbe possess  
449 intricate means to regulate chito-oligomer molecular size and acetylation status [8, 13, 49].

450 In *C. neoformans*, four putative chitin deacetylases contribute to the conversion of chitin to  
451 chitosan: Cda1, Cda2, Cda3, and Fpd1. Prior mutational analysis revealed that a *Cn cda1,2,3* triple mutant  
452 is devoid of most measurable cell wall chitosan during vegetative growth [21]. Although the Fpd1 enzyme  
453 is not required for chitosan conversion from chitin under normal growth conditions, it may contribute to  
454 the further deacetylation of pre-formed chitosan [50]. Consistent with the decrease of cell wall chitosan  
455 in the *cbi1Δ* mutant, we identified two of the four chitin deacetylase genes, *cda2* and *fpd1*, to be down-  
456 regulated in copper-deficient *cbi1Δ* cells. Hence, Cda2 and Fpd1 may be involved in regulating cell wall  
457 chitosan levels in response to cellular copper levels. Notably, *cda2* was previously identified as a Cuf1-  
458 regulated gene [4], which further strengthens the connection between cell wall chitosan and copper  
459 homeostasis. Therefore, Fpd1 together with Cda2 could potentially be involved in modulating the  
460 deacetylation ratio of chitosan molecules, and by doing so modulating the copper binding capacity of the  
461 aggregate cell wall sugar polymers in response to changing copper levels.

462 Cell wall chitin, among other cell wall sugars, is recognized by host pattern recognition receptors  
463 triggering immune activation and defense mechanism. Therefore, masking chitin is one important tool to  
464 evade immune defense. One strategy for dampening the immune recognition of chitin is its deacetylation  
465 to form chitosan [49]. Our cell wall analysis revealed a complex set of changes in response to copper  
466 homeostasis and the *cbi1*Δ mutation. Although the total levels of chitin and chitosan were decreased in  
467 the *cbi1*Δ strain, the degree of exposure of these cell wall sugars was greater in this strain compared to  
468 WT. Similar alterations in chitin/chitosan exposure have been shown to fundamentally alter the degree of  
469 immunological masking of fungal cells from recognition by host immune cells. In fact, there was a striking  
470 correlation between the degree of exposed chitin/chitosan exposure (as measured by WGA Alexa488  
471 staining) and the activation of a macrophage TNF-α response in fungal co-culture [13, 32]. Also, lectins  
472 and monoclonal antibodies that block chitin recognition have been proposed as adjunctive therapeutic  
473 strategies for cryptococcosis and other fungal infections [51].

474 In summary, we have defined cell wall changes that mediate adaptation of a fungal pathogen  
475 during conditions associated with human infection, including both high and low copper levels. In this way,  
476 the cell wall serves as both storage site for copper during low copper levels, as well as a copper-binding  
477 organelle to prevent excessive intracellular accumulation during copper toxicity. We have further defined  
478 cellular roles for a unique copper-binding protein that serves to mediate copper transfer between the  
479 fungal cell wall and copper import proteins.

480

## 481 **Material and Methods**

### 482 **Strains, media and growth conditions**

483 *Cryptococcus neoformans* strains used in this study are shown in **Supp Table 1**. All strains were generated  
484 in the *C. neoformans var. grubii H99* background. For strain creation, DNA was introduced into *C.*

485 *neoformans* by biolistic transformation [52]. Yeast extract (2%)-peptone (1%)-dextrose (2%) (YPD)  
486 medium supplemented with 2% agar and 100 µg ml<sup>-1</sup> of nourseothricin (NAT), 200 µg ml<sup>-1</sup> of neomycin  
487 (G418) or 200 µg ml<sup>-1</sup> of hygromycin B (HYG) was used for colony selection after biolistic transformation.  
488 Cloning strategies as well as plasmids and oligos used for creation of *Cryptococcus* transformation  
489 constructs are described in **Supp Table 2-3**. Transformants were screened by PCR and Southern blot for  
490 intended mutations. Cbi1-HA expression among relevant transformants was confirmed by western blot.

491 Strains were cultivated in either synthetic complete (SC) medium (MP Biomedicals) or YPD at 30°C.  
492 To induce Cu sufficiency or deficiency, media was supplemented with indicated concentrations of CuSO<sub>4</sub>  
493 or the Cu<sup>+</sup> chelator bathocuproine disulfonate (BCS), respectively. Alternatively, to BCS supplementation,  
494 strains were cultivated in Yeast extract-peptone medium supplemented with 3% Glycerol and 2% Ethanol  
495 (YPEG). For galactose-regulated expression induction, SC+2% Galactose (SC-Gal) or SC+2% Glucose (SC-  
496 Glu) was used and supplemented as indicated. To analyze cell wall associated phenotypes, caffeine (0.5  
497 mg/ mL), NaCl (1.5 M), SDS (0.01%), Congo red (0.5%) and Calcofluor White (1.5 mg/mL) were added to  
498 SC medium supplemented with CuSO<sub>4</sub> or BCS as indicated. For growth phenotype analysis on solid  
499 medium plates, a 6-fold serial dilution, starting at OD<sub>600</sub> 0.25, of strains was spotted and incubated for  
500 indicated time and temperature. For assessment of melanization, overnight cultures in YPD were washed  
501 once in PBS and resuspended in PBS to OD<sub>600</sub> 2.5. Next, 5 to 10 µL of the resuspended culture were spotted  
502 onto L-3,4-dihydroxyphenylalanine (L-DOPA) media (7.6 mM L-asparagine monohydrate, 5.6 mM glucose,  
503 22 mM KH<sub>2</sub>PO<sub>4</sub>, 1 mM MgSO<sub>4</sub>·7H<sub>2</sub>O, 0.5 mM L-DOPA, 0.3 µM thiamine-HCl, 20 nM biotin, pH 5.6). L-  
504 DOPA plates were incubated at 30°C for 2 days. To induce capsule, strains were incubated in CO<sub>2</sub>-  
505 independent tissue culture medium supplemented as indicated (TC, Gibco) for 72 hours with shaking at  
506 37°C, followed by staining with India Ink or fixation for scanning electron microscopy (SEM).

507

508 **RNA isolation and qRT-PCR**

509 For *ROM2* transcript analysis *C. neoformans* overnight cultures grown in synthetic complete (SC) medium  
510 (MP Biomedicals) were diluted to OD<sub>600</sub> 0.3, and cultures were supplemented and cultivated as indicated.  
511 For cell wall synthesis genes transcript analysis and copper status analysis, *C. neoformans* overnight  
512 cultures grown in YPD medium were diluted to OD<sub>600</sub> 0.05, supplemented as indicated and cultivated for  
513 24h at 30°C. For RNA extraction, cells were cultivated as indicated. Cultures were harvested, washed 1x  
514 with PBS and flash frozen on dry ice, followed by lyophilization. RNA was extracted using the RNeasy Plant  
515 Mini Kit (Qiagen) with optional on-column DNase digestion. cDNA for real time-PCR (RT-PCR) was  
516 prepared using the Iscript cDNA synthesis kit (Biorad). For RT-PCR, cDNA was diluted 1:5 in RNase-free  
517 water, added to ITAQ Universal SYBR Green Supermix (Bio-Rad) per protocol instructions and analyzed on  
518 a CFX384 C1000 ThermoCycler (BioRad, *ROM2* analysis and Cu status analysis). For analysis of cell wall  
519 transcripts, the diluted RNA was mixed with the PowerUP SYBR Green Master mix (applied biosystems)  
520 per protocol instruction and analyzed on a QuantStudio 6 Flex (applied biosystems). Oligos used for qRT-  
521 PCR analysis are shown in **Supp Table 3**. C<sub>T</sub> values were determined using the included CFX Maestro  
522 software (BioRad) or the QuantStudio 6 Flex, respectively. Gene expression values were normalized to  
523 the housekeeping gene *GAPDH* and expression fold changes determined by the  $\Delta\Delta C_T$  method. For all qRT-  
524 PCR studies, a minimum of 3 independent biological replicates were used for the analysis of mRNA  
525 expression changes.

526

### 527 **Inductively coupled plasma mass spectrometry (ICP-MS)**

528 Cell associated metals (Fe and Cu) were quantified from lyophilized yeast. In short, yeast cells were treated  
529 as indicated, spun down and washed 2x with ICP-MS grade water. In the last wash step, cell were counted,  
530 spun down and lyophilized. Samples were digested in 300 uL 50% ICP-MS grade Nitric Acid for 1h, at 90°C  
531 and cooled down overnight at RT. Metal content was analyzed by ICP-MS at the Oregon Health Sciences  
532 University elemental analysis facility on an Agilent 7700X ICP-MS.

533 **Liquid growth assays**

534 All liquid growth analysis were performed in 96 well plates. For the growth analysis in YPEG in the  
535 presence of the surface stressor SDS, overnight cultures (YPD, 30°C), were harvested and washed 1x with  
536 YPEG and then normalized to OD<sub>600</sub> 2.0 (in YPEG). Growth media was supplemented as indicated and filled  
537 into 96 well plate (195 µL each well). Wells were inoculated with 5 µL of indicated strain (final OD<sub>600</sub> =0.05).  
538 Plates were covered with a semipermeable membrane (Breathe-Easy, Diversified Biotech) and incubated  
539 at 30°C with shaking at 1150 rpm in a Finstruments shaker instrument. Growth graphs of the indicated  
540 strains at the conditions analyzed were generated by plotting the OD<sub>600</sub> readings normalized to WT-YPEG  
541 growth at the 24 h time point. Three biological replicates were performed.

542 For minimal inhibitory concentration analysis (MIC), overnight cultures (SC, 30°C), were harvested  
543 and washed 1x with PBS and then set to OD<sub>600</sub> 0.25 (in PBS) and stored on ice until further usage. 2x  
544 concentrated working stocks of caspofungin were prepared in SC medium (final concentration in assay  
545 ranged 100 to 0.78 µg/mL). Cells were diluted 1:100 in either SC or SC+200 µM BCS (final concentration  
546 in assay 100 µM BCS). In 96 well plate, 100 µL of diluted cells were mixed with 100 µL of 2x concentrated  
547 caspofungin stocks. The plate was covered with a semipermeable membrane (Breathe-Easy, Diversified  
548 Biotech) and incubated at 30°C with shaking at 1150 rpm in a Finstruments shaker instrument for 24h.  
549 Growth graphs of the indicated strains at the conditions analyzed were generated by calculating the  
550 relative growth of the drug-treated condition in relation to the untreated condition (drug-treated  
551 OD<sub>600</sub>/untreated OD<sub>600</sub>). Four biological replicates were performed.

552

553 **Transmission electron microscopy (TEM)**

554 Overnight cultures (YPD, 30°C) were harvested and washed 1x with YPD. Indicated strains were inoculated  
555 to an OD<sub>600</sub> of 0.05 in 50 mL YPD + 10 µM CuSO<sub>4</sub> (=Cu sufficiency) or 250 µM BCS (=Cu deficiency) and  
556 cultivated for 24h at 30°C. In the following day, 50 to 100 µL of the culture were harvested and washed



557 1x with PBS. Next, cells were pelleted and overlaid with fixative (4% formaldehyde, 2% Glutaraldehyde  
558 in PBS) and incubated for 4h at RT. Then, fixative was removed, and the sample was washed twice with  
559 1x PBS, with a 10 minute incubation time at RT in between wash steps. After last washing step, the PBS  
560 was removed and 1% OsO<sub>4</sub> was added to the sample to complete cover. The tube is sealed and incubated  
561 for 1h at RT in the dark. Then the OsO<sub>4</sub> was removed, and the sample rinsed with 1x PBS, 2 times for at  
562 least 10 minutes each time (RT). After last PBS rinse, residual PBS was removed and sample was rinse with  
563 0.1N acetate buffer, 1 time at least 10 minutes each time (RT). The acetate buffer was removed, and the  
564 sample was stained with 0.5% uranyl acetate (UA) for one hour, RT. Once staining is complete, the uranyl  
565 acetate was removed and the sample rinsed with 0.1N acetate buffer, 2 times at least 10 minutes each  
566 time. In the next steps the samples were dehydrated in several ethanol incubation steps by rinsing twice,  
567 at least 10 minutes each time, with 30% Ethanol, 50% Ethanol, 70% Ethanol and 90% Ethanol. Finally, the  
568 sample were rinsed 3 times, at least 10 minutes each time, with 100% Ethanol.

569       Once the dehydration was complete, ethanol was removed and the dehydrated sample was  
570 embedded into resin (53,5% (w/v) resin, 20.5% (w/v) DDSA, 26% (w/v) NMA, 1.4% (v/v) DMP-30). The  
571 sample were incubated in resin mix at RT overnight. The following day, samples were incubated at 50-  
572 60°C for 10 minutes, the old resin mix was replaced by freshly made resin mix and incubated for 10 mins  
573 at RT, followed by 10 minutes at at 50-60°C. This resin wash step was repeated one more time, followed  
574 by a 48h incubation at 50-60°C. The embedded samples were cut into 70nm thick sections on an Ultracut  
575 microtome and placed on TEM grids. The sections were counterstained with uranyl acetate and lead  
576 citrate and then imaged on an FEI Technai G2 Twin transmission electron microscope. Cell wall thickness  
577 was measured using ImageJ (Cu sufficient WT: 8 cells, Cu deficient WT: 7 cells, Cu sufficient *cbi1Δ*: 14 cells  
578 and Cu deficient *cbi1Δ*: 10 cells). The staining contrast in the cell wall was measured using Image J gray  
579 scale measurement tool.

## 580 **Scanning electron microscopy (SEM)**

581 Overnight cultures (YPD, 30°C) were harvested and washed 1x with PBS. Indicated strains were inoculated  
582 to an OD<sub>600</sub> of 0.1 in 25 mL CO<sub>2</sub>-independent medium (Gibco) or 25 mL CO<sub>2</sub>-independent medium  
583 supplemented with 250 µM BCS and cultivated for 3d at 37°C. 5 mL of each culture were harvested,  
584 checked for capsule formation by India ink stain and washed 3x with PBS (without calcium and  
585 magnesium). Cells were fixed for 1h at RT, using 2.5% glutaraldehyde in PBS and washed 3 times with PBS  
586 and checked for intact capsule by india ink staining. Then, cells were mounted onto poly-L-lysine- coated  
587 coverslips (Neuvitro, 12mm, #1 thickness coverslips) and incubated for 20 min at RT. After mounting, cells  
588 were sequentially dehydrated in several ethanol washes (1x 30%, 1X 50%, 1X 70%, each 5 min RT, followed  
589 by 1x 95% and 2x 100%, 10 min RT). After dehydration mounted cells were stored in 100% ethanol until  
590 the critical point drying. Cell samples were critical point dried with a Tousimis 931 critical point dryer  
591 (Rockville, Maryland) and coated with gold-palladium using a Cressington 108 sputter-coater (Watford,  
592 United Kingdom). Samples were mounted and imaged on a Hitachi S-4700 scanning electron microscope  
593 (Tokyo, Japan).

594

## 595 **Cell wall isolation and analysis**

596 Overnight cultures (YPD, 30°C) were harvested and washed 1x with YPD. Indicated strains were inoculated  
597 to an OD<sub>600</sub> of 0.05 in 50 mL YPD + 10 µM CuSO<sub>4</sub> (=Cu sufficiency) or 250 µM BCS (=Cu deficiency) and  
598 cultivated for 24h at 30°C. The following day, 10 to 25 mL of the cells were harvested and washed twice  
599 with dH<sub>2</sub>O. In the last wash step, cells were counted, spun down and lyophilized. Chitin and chitosan levels  
600 were quantified from lyophilized yeast using a modified MBTH (3-methyl-benzothiazolinone hydrazine  
601 hydrochloride) method as previously described [13]. β-glucan was quantified using the megazyme yeast  
602 β-glucan kit. In short lyophilized yeast were milled using glass beads, resuspended in 800 µL 2 M KOH and

603 transferred into a new 12 ml reaction tube and stirred for 30 mins in an ice water bath. Then, 3.2 mL of  
604 1.2 M sodium acetate pH 8.3 and 40  $\mu$ L gluczyme was added and the sample stirred for 2 min. The sample  
605 was transferred to a 15 mL screw cap tube and incubated ON at 40°C in a water bath. The next day, 10 mL  
606 dH<sub>2</sub>O was added to the samples, mixed thoroughly and centrifuged for 10 mins at 3000 rpm. Then, 100  
607  $\mu$ L of the supernatant was mixed with GOPOD reagent and incubated for 20 mins at 40°C in a water bath.  
608 2 x200  $\mu$ L of each sample were transferred into a 96 well plate and read (against reagent blank) at 510  
609 nm. A standard curve was prepared using the manufacturer's supplied D-glucose standard solution and  
610 mg glucose was calculated using equation provided by manufacturer. Measured values were normalized  
611 by cell count.

612

### 613 **Cell wall staining and flow cytometry**

614 Prior to analysis cells were treated as indicated. To visualize chitin, cells were harvested and stained  
615 with 100  $\mu$ g/ml Alexa488-conjugated wheat germ agglutinin (WGA, Molecular Probes) for 35 minutes in  
616 the dark, RT, followed by 25  $\mu$ g/ml calcofluor white (CFW, Fluka Analytical) for 10 minutes, RT. After  
617 staining, cells were washed 2x with PBS and were resuspended in 20-50  $\mu$ L PBS for microscopic analysis.  
618 Alexa488-WGA was imaged using a GFP filter and CFW was imaged using a DAPI filter. For flow cytometry,  
619 cells were Alexa488-WGA and CFW stained as previously described, washed 2x with PBS and set to 10<sup>6</sup>  
620 cells (in 1 mL PBS). Alexa488-WGA stained cells were analyzed using a 488 nm laser and CFW cells were  
621 analyzed using a 405 nm laser. The FACS analysis was performed at the Duke Cancer Institute Flow  
622 Cytometry Shared Resource using a BD FACSCanto II flow cytometer. Data was analyzed using FlowJo  
623 v10.1 software (FlowJo, LLC). For analysis only single cells were used (gated using the FSC/SSC plot). For  
624 chitin exposure analysis cells were gated in the CFW intensity/ Alexa488-WGA intensity scatter plot.

625 Additional histograms with mean fluorescence intensity (MFI) on the x-axis and cell counts on the y-axis  
626 were created. Unstained cells were used as negative controls.

627 To visualize chitosan, cells were treated as indicated, harvested and washed 2x with McIlvaine's  
628 buffer (0.2 M Na<sub>2</sub>HPO<sub>4</sub>, 0.1 M citric acid, pH 6.0). Then, cells were stained using 500 µL of 300 µg/ml Eosin  
629 Y in McIlvaine's buffer for 10 minutes at room temperature in the dark. Cells were then washed 2x with  
630 McIlvaine's buffer and resuspended in 20-50 µL McIlvaine's buffer. Cells were visualized using a GFP filter.

631

### 632 **Microscopic quantification**

633 Differential interference microscopy (DIC) and fluorescent images were visualized with a Zeiss Axio  
634 Imager fluorescence microscope (64X objectives). Images were taken with an AxioCam MRm digital  
635 camera with ZEN Pro software (Zeiss). The same exposure time was used to image all strains analyzed.  
636 Images were analyzed using ImageJ/Fiji software. Gray scale values were measured and normalized  
637 towards cell count. The intensity of the control strain (=Cu sufficient WT) was set to 1. Results are reported  
638 as relative fluorescence intensity +/- standard error of the means.

639 Cells sizes were measured using the ImageJ measurement tool. Capsule thickness was calculated using  
640 the equation:

$$641 \text{ capsule thickness} = \frac{(\text{cell diameter including capsule} - \text{cell body diameter})}{2}$$

642

### 643 **Generation of bone marrow derived macrophages**

644 Murine bone marrow cells were isolated from A/J mice and prepared as previously described [31].  
645 Briefly, femurs and tibias were isolated from mice. Each bone was flushed with 5 to 10 ml cold PBS using

646 a 27½ gauge needle. Red blood cells were lysed in 1x RBC lysis buffer (0.15 M NH<sub>4</sub>Cl, 1 mM NaHCO<sub>3</sub>, pH  
647 7.4) and cells were resuspended in 1x Dulbecco's modified Eagle's medium (DMEM; + 4.5 g/L D-Glucose,  
648 + L-Glutamine, +110 mg/L sodium pyruvate) with 1 U/ml penicillin/streptomycin. Bone marrow cells were  
649 cryopreserved in 90% FBS/10% endotoxin-free DMSO at a concentration of 1 x 10<sup>7</sup> cells/ml.

650 BMMs were differentiated in BMM medium (1x Dulbecco's modified Eagle's medium [DMEM; + 4.5  
651 g/L D-Glucose, + L-Glutamine, +110 mg/L sodium pyruvate], 10% fetal bovine serum [FBS; non-heat  
652 inactivated], 1 U/ml penicillin/streptomycin) with 3 ng/ml recombinant mouse GM-CSF (rGM-CSF; R&D  
653 Systems or BioLegend)) at a concentration of 2.5 x 10<sup>5</sup> cells/ml in 150 x 15 mm petri plates at 37°C with  
654 5% CO<sub>2</sub>. The media was refreshed every 3–4 days and the cells were harvested after ~7d or when  
655 confluency was achieved. The Duke University Institutional Animal Care and Use Committee reviewed and  
656 approved the protocol for the macrophage harvesting. Protocol registry number A102-20-05.

657

#### 658 **Macrophage co-incubation and TNF-α quantification**

659 Prior to co-incubation, overnight cultures of *C. neoformans* strains (YPD, 30°C) were harvested and  
660 washed 1x with YPD. Indicated strains were inoculated to an OD<sub>600</sub> of 0.05 in 50 mL YPD + 10 μM CuSO<sub>4</sub>  
661 (=Cu sufficiency) or 250 μM BCS (=Cu deficiency) and cultivated for 24h at 30°C. To prepare BMMs for the  
662 co-incubation assay, BMMs were counted (by hemocytometer, with Trypan blue to discount dead cells),  
663 plated in BMM medium in 96-well plates at a concentration of 5 x 10<sup>4</sup> cells/well and incubated at 37°C  
664 with 5% CO<sub>2</sub> overnight. The next day *C. neoformans* cells were washed 2x with PBS, counted, and added  
665 to BMMs containing 96-well plates at a concentration of 5 x 10<sup>5</sup> fungal cells per well  
666 (10:1 *C. neoformans* cells:BMMs). Co-cultures were incubated for 6h at 37°C with 5% CO<sub>2</sub>. Supernatants  
667 were collected and stored at -80°C until analysis. Secreted TNF-α was quantified in supernatants by  
668 enzyme-linked immunosorbent assay (ELISA; BioLegend).

669

## 670 **Statistical analysis**

671 For all data error bars represent statistical errors of the means (SEM) of results from a number of biological  
672 replicates (N), as indicated in figure legends. Before statistical analysis was conducted, data from all  
673 experiments was log transformed for comparison of proportions. Statistical analysis was performed with  
674 GraphPad Prism software v9. The statistical tests chosen for each experiment and their results (i.e., p  
675 values) are indicated in figure legends. Asterisks in figures correspond to statistical significance as follows:  
676 \*\*\*\*,  $P < 0.0001$ ; \*\*\*,  $P = 0.0001$  to  $P < 0.001$ ; \*\*,  $P = 0.001$  to  $P < 0.01$ ; \*,  $P = 0.01$  to  $P < 0.05$ ; ns (not  
677 significant),  $P > 0.05$ .

678

## 679 **Acknowledgements**

680 We thank the Duke Cancer Institute for the use of the Flow Cytometry Shared Resource. The Transmission  
681 electron microscopy was performed in part at the Duke University Shared Materials Instrumentation  
682 Facility (SMIF), a member of the North Carolina Research Triangle Nanotechnology Network (RTNN),  
683 which is supported by the National Science Foundation (award number ECCS-2025064) as part of the  
684 National Nanotechnology Coordinated Infrastructure (NNCI). Scanning electron microscopy was  
685 performed at the Chapel Hill Analytical and Nanofabrication Laboratory, CHANL, a member of the North  
686 Carolina Research Triangle Nanotechnology Network, RTNN, which is supported by the National Science  
687 Foundation, Grant ECCS-1542015, as part of the National Nanotechnology Coordinated Infrastructure,  
688 NNCI. ICP-MS measurements were performed in the OHSU Elemental Analysis Core. We thank Dr. Martina  
689 Ralle for her help and insight in sample preparation and ICP-MS data acquisition and Dr. Aaron D. Smith  
690 for insightful discussions of the data and proposed model. This work was also supported by funding from  
691 the National Institute Health: NIAID R01 AI074677 (JAA) and NIGMS R01GM041840 (DJT and JAA) and the  
692 German Research Foundation grant PR 1727/1-1 (given to CP).

694 **References**

- 695 1. Bleackley MR, MacGillivray RTA. Transition metal homeostasis: from yeast to human disease.  
696 *BioMetals*. 2011;24(5):785-809. doi: 10.1007/s10534-011-9451-4.
- 697 2. Smith AD, Logeman BL, Thiele DJ. Copper Acquisition and Utilization in Fungi. *Annu Rev Microbiol*.  
698 2017;71:597-623. Epub 2017/09/10. doi: 10.1146/annurev-micro-030117-020444. PubMed PMID:  
699 28886682; PubMed Central PMCID: PMC6827982.
- 700 3. Hood MI, Skaar EP. Nutritional immunity: transition metals at the pathogen-host interface. *Nat*  
701 *Rev Microbiol*. 2012;10(8):525-37. Epub 2012/07/17. doi: 10.1038/nrmicro2836. PubMed PMID:  
702 22796883; PubMed Central PMCID: PMC6827982.
- 703 4. Garcia-Santamarina S, Festa RA, Smith AD, Yu CH, Probst C, Ding C, et al. Genome-wide analysis  
704 of the regulation of Cu metabolism in *Cryptococcus neoformans*. *Mol Microbiol*. 2018;108(5):473-94.  
705 Epub 2018/04/03. doi: 10.1111/mmi.13960. PubMed PMID: 29608794; PubMed Central PMCID:  
706 PMC6827982.
- 707 5. Garcia-Santamarina S, Probst C, Festa RA, Ding C, Smith AD, Conklin SE, et al. A lytic polysaccharide  
708 monoxygenase-like protein functions in fungal copper import and meningitis. *Nature Chemical Biology*.  
709 2020;16(3):337-44. doi: 10.1038/s41589-019-0437-9.
- 710 6. Brander S, Horvath I, Ipsen JO, Peculyte A, Olsson L, Hernandez-Rollan C, et al. Biochemical  
711 evidence of both copper chelation and oxygenase activity at the histidine brace. *Sci Rep*.  
712 2020;10(1):16369. Epub 2020/10/03. doi: 10.1038/s41598-020-73266-y. PubMed PMID: 33004835;  
713 PubMed Central PMCID: PMC6827982.
- 714 7. Labourel A, Frandsen KEH, Zhang F, Brouilly N, Grisel S, Haon M, et al. A fungal family of lytic  
715 polysaccharide monoxygenase-like copper proteins. *Nature Chemical Biology*. 2020;16(3):345-50. doi:  
716 10.1038/s41589-019-0438-8.

- 717 8. Garcia-Rubio R, de Oliveira HC, Rivera J, Trevijano-Contador N. The Fungal Cell Wall: Candida,  
718 Cryptococcus, and Aspergillus Species. *Front Microbiol.* 2019;10:2993. Epub 2020/01/30. doi:  
719 10.3389/fmicb.2019.02993. PubMed PMID: 31993032; PubMed Central PMCID: PMC6962315.
- 720 9. Hopke A, Brown AJP, Hall RA, Wheeler RT. Dynamic Fungal Cell Wall Architecture in Stress  
721 Adaptation and Immune Evasion. *Trends Microbiol.* 2018;26(4):284-95. Epub 2018/02/18. doi:  
722 10.1016/j.tim.2018.01.007. PubMed PMID: 29452950; PubMed Central PMCID: PMC5869159.
- 723 10. Camacho E, Vij R, Chrissian C, Prados-Rosales R, Gil D, O'Meally RN, et al. The structural unit of  
724 melanin in the cell wall of the fungal pathogen *Cryptococcus neoformans*. *Journal of Biological Chemistry.*  
725 2019;294(27):10471-89. doi: <https://doi.org/10.1074/jbc.RA119.008684>.
- 726 11. O'Meara TR, Alspaugh JA. The *Cryptococcus neoformans* Capsule: a Sword and a Shield.  
727 2012;25(3):387-408. doi: doi:10.1128/CMR.00001-12.
- 728 12. Erwig LP, Gow NAR. Interactions of fungal pathogens with phagocytes. *Nature Reviews*  
729 *Microbiology.* 2016;14(3):163-76. doi: 10.1038/nrmicro.2015.21.
- 730 13. Ost KS, Esher SK, Leopold Wager CM, Walker L, Wagener J, Munro C, et al. Rim Pathway-Mediated  
731 Alterations in the Fungal Cell Wall Influence Immune Recognition and Inflammation. *mBio.* 2017;8(1).  
732 Epub 2017/02/02. doi: 10.1128/mBio.02290-16. PubMed PMID: 28143983; PubMed Central PMCID:  
733 PMC5285508.
- 734 14. Mahl CRA, Taketa TB, Rocha-Neto JBM, Almeida WP, Beppu MM. Copper Ion Uptake by Chitosan  
735 in the Presence of Amyloid-beta and Histidine. *Appl Biochem Biotechnol.* 2020;190(3):949-65. Epub  
736 2019/10/21. doi: 10.1007/s12010-019-03120-z. PubMed PMID: 31630339.
- 737 15. M.D. Mullen DCW, T.J. Beveridge, G.W. Bailey,. Sorption of heavy metals by the soil fungi  
738 *Aspergillus niger* and *Mucor rouxii*. *Soil Biology and Biochemistry.* 1992; 24(2):129-35. doi:  
739 [https://doi.org/10.1016/0038-0717\(92\)90268-3](https://doi.org/10.1016/0038-0717(92)90268-3).



- 740 16. Staudt MW, Kruzel EK, Shimizu K, Hull CM. Characterizing the role of the microtubule binding  
741 protein Bim1 in *Cryptococcus neoformans*. *Fungal genetics and biology : FG & B*. 2010;47(4):310-7. Epub  
742 2010/01/02. doi: 10.1016/j.fgb.2009.12.010. PubMed PMID: 20044015; PubMed Central PMCID:  
743 PMCPMC2835843.
- 744 17. Dichtl K, Samantaray S, Wagener J. Cell wall integrity signalling in human pathogenic fungi. *Cell*  
745 *Microbiol*. 2016;18(9):1228-38. Epub 2016/05/08. doi: 10.1111/cmi.12612. PubMed PMID: 27155139.
- 746 18. de Oliveira HC, Rossi SA, García-Barbazán I, Zaragoza Ó, Trevijano-Contador N. Cell Wall Integrity  
747 Pathway Involved in Morphogenesis, Virulence and Antifungal Susceptibility in *Cryptococcus neoformans*.  
748 *Journal of fungi* (Basel, Switzerland). 2021;7(10). Epub 2021/10/24. doi: 10.3390/jof7100831. PubMed  
749 PMID: 34682253; PubMed Central PMCID: PMCPMC8540506.
- 750 19. Kuranda K, Leberre V, Sokol S, Palamarczyk G, Francois J. Investigating the caffeine effects in the  
751 yeast *Saccharomyces cerevisiae* brings new insights into the connection between TOR, PKC and Ras/cAMP  
752 signalling pathways. *Mol Microbiol*. 2006;61(5):1147-66. Epub 2006/08/24. doi: 10.1111/j.1365-  
753 2958.2006.05300.x. PubMed PMID: 16925551.
- 754 20. Heilmann CJ, Sorgo AG, Mohammadi S, Sosinska GJ, de Koster CG, Brul S, et al. Surface stress  
755 induces a conserved cell wall stress response in the pathogenic fungus *Candida albicans*. *Eukaryot Cell*.  
756 2013;12(2):254-64. Epub 2012/12/18. doi: 10.1128/EC.00278-12. PubMed PMID: 23243062.
- 757 21. Baker LG, Specht CA, Donlin MJ, Lodge JK. Chitosan, the deacetylated form of chitin, is necessary  
758 for cell wall integrity in *Cryptococcus neoformans*. *Eukaryot Cell*. 2007;6(5):855-67. Epub 2007/04/03. doi:  
759 10.1128/EC.00399-06. PubMed PMID: 17400891; PubMed Central PMCID: PMCPMC1899242.
- 760 22. Sun T-S, Ju X, Gao H-L, Wang T, Thiele DJ, Li J-Y, et al. Reciprocal functions of *Cryptococcus*  
761 *neoformans* copper homeostasis machinery during pulmonary infection and meningoencephalitis. *Nature*  
762 *Communications*. 2014;5(1):5550. doi: 10.1038/ncomms6550.

- 763 23. Walton FJ, Idnurm A, Heitman J. Novel gene functions required for melanization of the human  
764 pathogen *Cryptococcus neoformans*. *Mol Microbiol.* 2005;57(5):1381-96. Epub 2005/08/17. doi:  
765 10.1111/j.1365-2958.2005.04779.x. PubMed PMID: 16102007.
- 766 24. Saikia S, Oliveira D, Hu G, Kronstad J, Deepe GS. Role of Ferric Reductases in Iron Acquisition and  
767 Virulence in the Fungal Pathogen *Cryptococcus neoformans*. 2014;82(2):839-50. doi:  
768 doi:10.1128/IAI.01357-13.
- 769 25. Jung WH, Kronstad JW. Iron and fungal pathogenesis: a case study with *Cryptococcus neoformans*.  
770 *Cell Microbiol.* 2008;10(2):277-84. Epub 2007/11/29. doi: 10.1111/j.1462-5822.2007.01077.x. PubMed  
771 PMID: 18042257.
- 772 26. Kronstad JW, Hu G, Jung WH. An encapsulation of iron homeostasis and virulence in *Cryptococcus*  
773 *neoformans*. *Trends Microbiol.* 2013;21(9):457-65. Epub 2013/07/03. doi: 10.1016/j.tim.2013.05.007.  
774 PubMed PMID: 23810126; PubMed Central PMCID: PMC3769505.
- 775 27. Mukaremera L, Lee KK, Wagener J, Wiesner DL, Gow NAR, Nielsen K. Titan cell production in  
776 *Cryptococcus neoformans* reshapes the cell wall and capsule composition during infection. *The Cell*  
777 *Surface.* 2018;1:15-24. doi: <https://doi.org/10.1016/j.tcs.2017.12.001>.
- 778 28. Dambuza IM, Drake T, Chapuis A, Zhou X, Correia J, Taylor-Smith L, et al. The *Cryptococcus*  
779 *neoformans* Titan cell is an inducible and regulated morphotype underlying pathogenesis. *PLoS Pathog.*  
780 2018;14(5):e1006978. Epub 2018/05/19. doi: 10.1371/journal.ppat.1006978. PubMed PMID: 29775474;  
781 PubMed Central PMCID: PMC5959070.
- 782 29. Chrissian C, Camacho E, Fu MS, Prados-Rosales R, Chatterjee S, Cordero RJB, et al. Melanin  
783 deposition in two *Cryptococcus* species depends on cell-wall composition and flexibility. *J Biol Chem.*  
784 2020;295(7):1815-28. Epub 2020/01/04. doi: 10.1074/jbc.RA119.011949. PubMed PMID: 31896575;  
785 PubMed Central PMCID: PMC7029119.

- 786 30. Ding C, Yin J, Tovar EM, Fitzpatrick DA, Higgins DG, Thiele DJ. The copper regulon of the human  
787 fungal pathogen *Cryptococcus neoformans* H99. *Mol Microbiol.* 2011;81(6):1560-76. Epub 2011/08/09.  
788 doi: 10.1111/j.1365-2958.2011.07794.x. PubMed PMID: 21819456; PubMed Central PMCID:  
789 PMCPMC3718005.
- 790 31. Ost KS, O'Meara TR, Huda N, Esher SK, Alspaugh JA. The *Cryptococcus neoformans* alkaline  
791 response pathway: identification of a novel rim pathway activator. *PLoS Genet.* 2015;11(4):e1005159.  
792 Epub 2015/04/11. doi: 10.1371/journal.pgen.1005159. PubMed PMID: 25859664; PubMed Central  
793 PMCID: PMCPMC4393102.
- 794 32. Esher SK, Ost KS, Kohlbrenner MA, Pianalto KM, Telzrow CL, Campuzano A, et al. Defects in  
795 intracellular trafficking of fungal cell wall synthases lead to aberrant host immune recognition. *PLOS*  
796 *Pathogens.* 2018;14(6):e1007126. doi: 10.1371/journal.ppat.1007126.
- 797 33. Pianalto KM, Billmyre RB, Telzrow CL, Alspaugh JA. Roles for Stress Response and Cell Wall  
798 Biosynthesis Pathways in Caspofungin Tolerance in *Cryptococcus neoformans*. *Genetics.* 2019;213(1):213-  
799 27. Epub 2019/07/04. doi: 10.1534/genetics.119.302290. PubMed PMID: 31266771; PubMed Central  
800 PMCID: PMCPMC6727808.
- 801 34. Walker LA, Munro CA, de Bruijn I, Lenardon MD, McKinnon A, Gow NAR. Stimulation of Chitin  
802 Synthesis Rescues *Candida albicans* from Echinocandins. *PLOS Pathogens.* 2008;4(4):e1000040. doi:  
803 10.1371/journal.ppat.1000040.
- 804 35. Fortwendel JR, Juvvadi PR, Perfect BZ, Rogg LE, Perfect JR, Steinbach WJ. Transcriptional  
805 regulation of chitin synthases by calcineurin controls paradoxical growth of *Aspergillus fumigatus* in  
806 response to caspofungin. *Antimicrobial agents and chemotherapy.* 2010;54(4):1555-63. Epub  
807 2010/02/04. doi: 10.1128/aac.00854-09. PubMed PMID: 20124000; PubMed Central PMCID:  
808 PMCPMC2849361.

- 809 36. Frases S, Pontes B, Nimrichter L, Viana NB, Rodrigues ML, Casadevall A. Capsule of  
810 *Cryptococcus neoformans* grows by enlargement of polysaccharide molecules.  
811 2009;106(4):1228-33. doi: 10.1073/pnas.0808995106 %J Proceedings of the National Academy of  
812 Sciences.
- 813 37. Jiang N, Sun N, Xiao D, Pan J, Wang Y, Zhu X. A copper-responsive factor gene CUF1 is required for  
814 copper induction of laccase in *Cryptococcus neoformans*. FEMS microbiology letters. 2009;296(1):84-90.  
815 Epub 2009/05/23. doi: 10.1111/j.1574-6968.2009.01619.x. PubMed PMID: 19459959.
- 816 38. Ding C, Festa RA, Chen YL, Espart A, Palacios Ò, Espín J, et al. *Cryptococcus neoformans* copper  
817 detoxification machinery is critical for fungal virulence. Cell host & microbe. 2013;13(3):265-76. Epub  
818 2013/03/19. doi: 10.1016/j.chom.2013.02.002. PubMed PMID: 23498952; PubMed Central PMCID:  
819 PMC3668348.
- 820 39. Li C, Li Y, Ding C. The Role of Copper Homeostasis at the Host-Pathogen Axis: From Bacteria to  
821 Fungi. Int J Mol Sci. 2019;20(1):175. doi: 10.3390/ijms20010175. PubMed PMID: 30621285.
- 822 40. Garcia-Santamarina S, Uzarska MA, Festa RA, Lill R, Thiele DJ. *Cryptococcus neoformans* Iron-  
823 Sulfur Protein Biogenesis Machinery Is a Novel Layer of Protection against Cu Stress. mBio [Internet]. 2017  
824 2017/10//; 8(5).
- 825 41. Sun T, Li Y, Li Y, Li H, Gong Y, Wu J, et al. Proteomic Analysis of Copper Toxicity in Human Fungal  
826 Pathogen *Cryptococcus neoformans*. 2021;11(747). doi: 10.3389/fcimb.2021.662404.
- 827 42. Sun T, Li X, Song W, Yu S, Wang L, Ding C, et al. Metabolomic alterations associated with copper  
828 stress in *Cryptococcus neoformans*. Future Microbiol. 2021;16:305-16. Epub 2021/02/27. doi:  
829 10.2217/fmb-2020-0290. PubMed PMID: 33635120.
- 830 43. Broxton CN, Culotta VC. An Adaptation to Low Copper in *Candida albicans* Involving SOD Enzymes  
831 and the Alternative Oxidase. PLOS ONE. 2016;11(12):e0168400. doi: 10.1371/journal.pone.0168400.

- 832 44. Kropat J, Gallaher SD, Urzica EI, Nakamoto SS, Strenkert D, Tottey S, et al. Copper economy in  
833 Chlamydomonas: prioritized allocation and reallocation of copper to respiration vs. photosynthesis. Proc  
834 Natl Acad Sci U S A. 2015;112(9):2644-51. Epub 2015/02/04. doi: 10.1073/pnas.1422492112. PubMed  
835 PMID: 25646490; PubMed Central PMCID: PMC4352834.
- 836 45. Smith AD, Garcia-Santamarina S, Ralle M, Loiselle DR, Haystead TA, Thiele DJ. Transcription factor-  
837 driven alternative localization of *Cryptococcus neoformans* superoxide dismutase. J Biol Chem.  
838 2021;296:100391. Epub 2021/02/11. doi: 10.1016/j.jbc.2021.100391. PubMed PMID: 33567338; PubMed  
839 Central PMCID: PMC7961099.
- 840 46. Ipsen JØ, Hallas-Møller M, Brander S, Lo Leggio L, Johansen KS. Lytic polysaccharide  
841 monoxygenases and other histidine-brace copper proteins: structure, oxygen activation and  
842 biotechnological applications. Biochemical Society Transactions. 2021;49(1):531-40. doi:  
843 10.1042/BST20201031 %J Biochemical Society Transactions.
- 844 47. Rani Singhania R, Dixit P, Kumar Patel A, Shekher Giri B, Kuo C-H, Chen C-W, et al. Role and  
845 significance of lytic polysaccharide monoxygenases (LPMOs) in lignocellulose deconstruction.  
846 Bioresource Technology. 2021;335:125261. doi: <https://doi.org/10.1016/j.biortech.2021.125261>.
- 847 48. Black B, Lee C, Horianopoulos LC, Jung WH, Kronstad JW. Respiring to infect: Emerging links  
848 between mitochondria, the electron transport chain, and fungal pathogenesis. PLoS pathogens.  
849 2021;17(7):e1009661-e. doi: 10.1371/journal.ppat.1009661. PubMed PMID: 34237096.
- 850 49. Hole CR, Lam WC, Upadhy R, Lodge JK. *Cryptococcus neoformans* Chitin Synthase 3 Plays a  
851 Critical Role in Dampening Host Inflammatory Responses. mBio. 2020;11(1). Epub 2020/02/20. doi:  
852 10.1128/mBio.03373-19. PubMed PMID: 32071275; PubMed Central PMCID: PMC7029146.
- 853 50. Hembach L, Bonin M, Gorzelanny C, Moerschbacher BM. Unique subsite specificity and potential  
854 natural function of a chitosan deacetylase from the human pathogen *Cryptococcus neoformans*. Proc Natl

855 Acad Sci U S A. 2020;117(7):3551-9. Epub 2020/02/06. doi: 10.1073/pnas.1915798117. PubMed PMID:  
856 32015121; PubMed Central PMCID: PMC7035615.

857 51. Fonseca FL, Guimarães AJ, Kmetzsch L, Dutra FF, Silva FD, Taborda CP, et al. Binding of the wheat  
858 germ lectin to *Cryptococcus neoformans* chitooligomers affects multiple mechanisms required for fungal  
859 pathogenesis. *Fungal genetics and biology : FG & B.* 2013;60:64-73. Epub 2013/04/24. doi:  
860 10.1016/j.fgb.2013.04.005. PubMed PMID: 23608320; PubMed Central PMCID: PMC4294701.

861 52. Toffaletti DL, Rude TH, Johnston SA, Durack DT, Perfect JR. Gene transfer in *Cryptococcus*  
862 *neoformans* by use of biolistic delivery of DNA. *Journal of bacteriology.* 1993;175(5):1405-11. Epub  
863 1993/03/01. doi: 10.1128/jb.175.5.1405-1411.1993. PubMed PMID: 8444802; PubMed Central PMCID:  
864 PMCPMC193227.

865

## 866 **Figure Legends**

867 **Figure 1: The Cuf1 transcription factor as well as its targets Cbi1 and Ctr1 are involved in maintaining cell**  
868 **wall integrity during copper deficiency.**

869 **(A)** qRT-PCR analysis of the *ROM2* transcript level in indicated strains. For the high copper condition, the  
870 WT, *cuf1Δ* and Cuf1-Flag complemented *cuf1Δ<sup>c</sup>* strains were inoculated to OD<sub>600</sub> 0.3 in SC supplemented  
871 with 1 mM CuSO<sub>4</sub> and cultivated for 1h at 30°C. To induce low copper conditions, indicated strains were  
872 inoculated to OD<sub>600</sub> 0.3 in SC supplemented with 1 mM BCS and cultivated for 6h at 30°C. For comparison  
873 the WT *ROM2* transcript levels at each condition were set to 1. Presented is the mean +/- SEM of the  
874 relative transcript levels of 4 biological replicates. A 2-way ANOVA was performed using GraphPad Prism  
875 from log transformed data. **(B)** Growth analysis in presence of cell wall/ surface stressors. The spotting  
876 assay was performed on SC supplemented with 100 μM BCS which was co-supplemented with indicated  
877 amounts of cell wall and cell surface stressors. Indicated strains were grown overnight in SC at 30°C. Cells

878 were diluted to OD<sub>600</sub> 0.25 and a serial 1:10 dilution was spotted onto media plates. Plates were incubated  
879 at 30°C for 2-4d. This figure shows a representative image from 3 independent spotting experiments. **(C)**  
880 *GAL7* promoter-driven expression of Cbi1 in different *cut1Δ ctrΔ* strains during cell wall stress. The spotting  
881 assay was performed on SC with either glucose (SC-Glu) or galactose (SC-Gal) as carbohydrate source,  
882 supplemented with indicated amounts of CuSO<sub>4</sub>, BCS and congo red. Indicated strains were grown  
883 overnight in SC at 30°C. Cells were diluted in PBS to OD<sub>600</sub> 0.25, and a serial 1:10 dilution was spotted on to  
884 media plates. Plates were incubated at 30°C for 3d. This figure shows a representative image from 3  
885 independent spotting experiments. **(D)** Growth of WT, *cbi1Δ* and Cbi1 WT complemented *cbi1Δ (cbi1Δ<sup>C-WT</sup>)*  
886 in presence of 0.01% SDS in YPEG w/o 5 μM CuSO<sub>4</sub>. Growth was measured via OD<sub>600</sub> after 72h at 30°C and  
887 was normalized to WT growth in YPEG media. Presented is the mean +/- SEM of the relative growth rates  
888 of 3 biological replicates. 1-way ANOVA was performed using GraphPad Prism from log transformed data.  
889 **(E)** Impact of the *ccc2Δ* mutation on growth in presence of the cell wall stressor Congo red. The spotting  
890 assay was performed on SC supplemented with 100 μM or 500 μM BCS which was co-supplemented with  
891 0.5% Congo red. Indicated strains were grown overnight in SC at 30°C. Cells were diluted to OD<sub>600</sub> of 0.25  
892 and a serial 1:10 dilution was spotted on to media plates. Plates were incubated at 30°C for 2-4d. **(D)**  
893 Copper restoration of cell wall stressor sensitivity of *cbi1Δ* cells. The spotting assay was performed on SC+  
894 0.5 % congo red supplemented with indicated amounts of BCS, CuSO<sub>4</sub> and/or FeCl<sub>3</sub>. Indicated strains were  
895 grown overnight in SC at 30°C. Cells were diluted to OD<sub>600</sub> of 2.5 and a serial 1:10 dilution was spotted on  
896 to media plates. Plates were incubated at 30°C for 3d. This figure shows a representative image from 3  
897 independent spotting experiments.

898

899 **Figure 2: Copper deficient *cbi1Δ* cells show a significant loss of cell wall carbohydrates, reflected by**  
900 **transcriptional mis-regulation in cell wall-associated genes.**

901 TEM images of copper sufficient or deficient WT and *cbi1Δ* cells. Cells were incubated in YPD  
902 supplemented with 10 μM CuSO<sub>4</sub> (Cu sufficiency) or with 250 μM BCS (Cu deficiency) for 24h at 30°C. **(A)**  
903 Representative images of the TEM analysis (in 29000 x magnification). **(B)** Quantification of cell wall  
904 thickness. Measurements were performed using the ImageJ/Fiji measurement tool: Cu sufficiency-WT 10  
905 cells, Cu sufficiency- *cbi1Δ* 8 cells, Cu deficiency-WT 11 cells and Cu deficiency-*cbi1Δ* 14 cells. A 1-way  
906 ANOVA was performed using GraphPad Prism from log transformed data. **(C)** Quantification of the cell  
907 wall staining intensity. Presented is the analysis of two sets of TEM images. The gray value was measured  
908 with ImageJ/Fiji and plotted against the distance along the cell wall. **(D)** qRT-PCR analysis Transcripts  
909 involved in chitin and chitosan biosynthesis in copper-deficient WT, *cbi1Δ*, and complemented *cbi1Δ*  
910 (*cbi1Δ<sup>C-WT</sup>*) cells. Cells were inoculated to OD<sub>600</sub> 0.05 in YPD supplemented with 250μM BCS and cultivated  
911 for 24h at 30°C. For comparison, the WT transcript levels were set to 1. Presented is the mean +/- SEM of  
912 the relative transcript levels of minimum 4 biological replicates. A 1-way ANOVA was performed using  
913 GraphPad Prism from log transformed data. **(E)** qRT-PCR analysis Transcripts involved in glucan  
914 biosynthesis in copper deficiency. Cells were treated as described in (A). Presented is the mean +/- SEM  
915 of the relative transcript levels of minimum 4 biological replicates. A 1-way ANOVA was performed using  
916 GraphPad Prism from log transformed data.

917

918 **Figure 3: Cbi1 affects cell wall chitin and chitosan deposition and architecture during copper deficiency.**

919 **(A)-(B)** MBTH based chitin/chitosan quantification from purified cell wall material of copper sufficient (A)  
920 or deficient (B) WT, *cbi1Δ* and Cbi1 WT complemented *cbi1Δ* (*cbi1Δ<sup>C-WT</sup>*) cells. Strains were incubated for  
921 24h in YPD+ 10 uM CuSO<sub>4</sub> (copper sufficiency) or YPD +250 uM BCS (copper deficiency). Values are shown  
922 in uM Glucosamin/10<sup>7</sup> cells. Presented is the mean +/- SEM of 3 biological replicates. A 1-way ANOVA was  
923 performed using GraphPad Prism from log transformed data. **(C)** Calcofluor white (CFW) and wheat germ



924 agglutinin (WGA)-Alexa 488 staining for chitin of copper sufficient or deficient WT, *cbi1Δ* and Cbi1 WT  
925 complemented *cbi1Δ* (*cbi1Δ<sup>C-WT</sup>*) cells. Strains were as described in (A) and double stained with CFW and  
926 WGA-Alexa 488. Shown are representative images. Three independent treatments and stainings were  
927 performed. **(D)** EosinY staining for chitosan of copper sufficient and deficient WT, *cbi1Δ* and Cbi1 WT  
928 complemented *cbi1Δ* (*cbi1Δ<sup>C-WT</sup>*) cells. Strains were cultivated as described in (A), followed by EosinY  
929 staining. Shown are representative images. Five independent treatments and staining were performed.  
930 **(E-H)** FACS analysis of CFW and WGA-Alexa 488 stained cells. WT, *cbi1Δ* and *cbi1Δ<sup>C-WT</sup>* complemented cells  
931 were incubated for 24h in YPD+ 10 μM CuSO<sub>4</sub> (E, F; copper sufficiency) or YPD +250 μM BCS (G,H; copper  
932 deficiency), harvest and double stained with CFW and WGA-Alexa 488. Stained cells were analyzed using  
933 a FACS Canto A Analyzer and data were analyzed using Flow Jo. **(E)** and **(G)** show representative FACS  
934 profiles of indicated copper sufficient or deficient strains, **(F)** and **(H)** show the quantification of the  
935 population pattern from 3 independent experiments. A 2-way ANOVA was performed using GraphPad  
936 Prism from log transformed data.

937

#### 938 **Figure 4: Chitosan deposition in the cell wall influences *C. neoformans* growth during copper stress**

939 **(A)** Proposed model for the role of chitosan deposition to withstand copper stress. The cryptococcal cell  
940 wall is a dynamic multi-layered compartment build up by the sugar polymers chitin, α- and β-glucans.  
941 Chitin (solid blue) and its deacetylated form chitosan (dotted blue) build the inner cell wall layer, which is  
942 covered by an upper layer of β-glucans (purple) and α-glucans (black). The pigment melanin (brown  
943 circles) is incorporated and attached to cell wall chitosan, and the cryptococcal capsule (green dots) is  
944 attached to α-glucans. **(B-C)** Growth analysis in the presence of low (B) and high (C) copper stress. The  
945 spotting assay was performed on YPD supplemented with indicated amounts of BCS or CuSO<sub>4</sub>. Indicated

946 strains were grown overnight in YPD at 30°C. Cells were diluted to OD<sub>600</sub> of 0.2 and a serial 1:10 dilution  
947 was spotted on to media plates. Plates were incubated at 30°C for 2-6d.

948

949 **Figure 5: Cbi1 depletion and copper deficiency impacts several cell wall associated virulence phenotypes**

950 **(A)** Macrophage activation assay upon infection with copper sufficient or deficient WT, *cbi1Δ* and *cbi1Δ<sup>C</sup>*  
951 *WT* complemented cells. BMMs were harvested from A/J mice and co-incubated with *Cn* cells at an MOI of  
952 10:1 (Cn:BMMs), followed by an ELISA-based quantification of TNF-α (pg) in the supernatant. Presented  
953 is the mean +/- SEM of 5 independent experiments. A 2-way ANOVA was performed using GraphPad Prism  
954 from log transformed data. **(B)** Minimal inhibitory concentration (MIC) analysis of caspofungin during  
955 copper deficiency. WT, *cbi1Δ* and *cbi1Δ<sup>C-WT</sup>* were grown in 96-well liquid cultures in SC media  
956 supplemented with 100 μM BCS and were co-treated with 0 to 100 ug/mL caspofungin. OD<sub>600</sub> was  
957 measured after 24h of growth at 30°C and the OD<sub>600</sub> of the non-treated condition was set to 1. Presented  
958 is the mean +/- SEM of 4 independent experiments. A 2-way ANOVA was performed using GraphPad Prism  
959 from log transformed data. **(C)** Melanization of WT, *cbi1Δ*, *ctr1Δ* and *ctr4Δ* cells in the absence and  
960 presence of 5 μM CuSO<sub>4</sub>. Overnight cultures were harvested, washed 1x with PBS, diluted to OD<sub>600</sub> 2.5 and  
961 spotted on to L-DOPA plates. Shown are representative images from 3 independent experiments. **(D)**  
962 Analysis of capsule formation using India ink contrast staining of WT, *cbi1Δ* and *cbi1Δ<sup>C-WT</sup>* complemented  
963 cells. Indicated strains were grown for 3d in capsule inducing conditions in presence and absence of 250  
964 μM BCS. Cell were harvest, resuspended in PBS, stained with India ink (1:1) and analyzed using the DIC  
965 channel. Shown are representative images from 3 independent experiments. **(E)** Quantification of capsule  
966 size from India ink staining. Images taken were analyzed with imageJ/Fiji. A minimum of 170 cells of each  
967 strain were analyzed. Data are presented as box and whiskers diagram with indicated median and min  
968 and max of capsule sized measured for the indicated strain. A mixed effect analysis was performed using

969 the log transformed data. **(F)** Scanning electron microscopy (SEM) analysis of WT and *cbi1Δ* cells in  
970 absence and presence of 250 μM BCS.

971

972 **Supp Fig. 1:**

973 **(A)** Growth analysis in presence of cell wall/ surface stressors. The spotting assay was performed on SC  
974 supplemented with indicated amounts of cell wall and cell surface stressors. Indicated strains were grown  
975 overnight in SC at 30°C. Cells were diluted to OD<sub>600</sub> of 0.25 and a serial 1:10 dilution was spotted on to  
976 media plates. Plates were incubated at 30°C for 2-4d. This figure shows a representative image from 3  
977 independent spotting experiments. **(B)** Growth rate of copper sufficient or deficient WT and *cbi1Δ* cells.  
978 Cells were incubated in YPD supplemented with 10 μM CuSO<sub>4</sub> (Cu sufficiency) or with 250 μM BCS (Cu  
979 deficiency) for 24h at 30°C. Growth was measured through OD<sub>600</sub>. Presented is the average +/- SEM of 5  
980 biological replicates. **(C)** Colony forming unit (CFU) analysis of copper sufficient or deficient WT and *cbi1Δ*  
981 cells. Cells were treated as described in (B). After 24h of growth, cells were diluted to OD<sub>600</sub> 1. 200 μL of a  
982 serial 1:1000 dilution were plated onto YPD plates and colonies were counted after 3d of incubation at  
983 30°C. The CFU of copper sufficient WT was set to 100%. Presented is the average +/- SEM of the relative  
984 CFU (as compared to copper sufficient WT) from 4 biological replicates. **(D)** qRT-PCR analysis using *CMT1*  
985 and *CTR4* as indicator for Cu toxicity or deficiency. Indicated cells were cultivated as described in (B) and  
986 used for RNA extraction, followed by cDNA synthesis. Presented is ΔΔC<sub>T</sub> of copper deficiency: copper  
987 sufficiency. The average +/- SEM from 3 biological replicates is shown. **(E-F)** ICP-MS based metal  
988 quantification of cell associated copper (E) and Iron (F) in pg metal per 10<sup>6</sup> cells. Indicated strains were  
989 grown as described in (B). Presented is the average +/- SEM from 3 biological replicates.

990

991 **Supp Fig. 2:**

992 **(A)**  $\beta$ -glucan quantification of copper sufficient and copper deficient wt, *cbi1 $\Delta$*  and *cbi1 $\Delta$ <sup>C-WT</sup>*  
993 complemented cells. Strains were incubated for 24h in YPD+ 10  $\mu$ M CuSO<sub>4</sub> (Cu sufficiency) or YPD +250  
994  $\mu$ M BCS (Cu deficiency) and then harvested, cell counted and lyophilized. The Megazyme yeast b-glucan  
995 kit was used for quantification of b-glucan from lyophilized cells. Values are shown in  $\mu$ g Glucose / 10<sup>7</sup>  
996 cells. Presented is the average +/- SEM of 3 biological replicates. **(B)** Calcofluor white (CFW) and wheat  
997 germ agglutinin (WGA)-Alexa 488 staining for chitin of copper sufficient or deficient WT, *cbi1 $\Delta$*  and *Cbi1*  
998 WT complemented *cbi1 $\Delta$*  (*cbi1 $\Delta$ <sup>C-WT</sup>*) cells. Strains were cultivated as described in (A). Shown is the mean  
999 +/- SEM of the relative CFW intensity from 3 independent experiments. The CFW intensities were  
1000 measured with ImageJ/Fiji and normalized to cell count. Shown is the relative CFW intensity (copper  
1001 sufficient WT set to 1). A 1-way ANOVA was performed using GraphPad Prism from log transformed data.  
1002 **(C)** EosinY staining for chitosan of copper sufficient and deficient WT, *cbi1 $\Delta$*  and *cbi1 $\Delta$ <sup>C-WT</sup>* complemented  
1003 cells. Strains were cultivated as described in (A), followed by EosinY staining. Shown are representative  
1004 images for 2 two independent experiments. Five independent treatments and stainings were performed.  
1005 **(D)** Relative EosinY intensity from 5 independent experiments. The EosinY intensities were measure with  
1006 ImageJ/Fiji and normalized to cell count. Shown is mean +/- SEM of the relative EosinY intensity (copper  
1007 sufficient WT set to 1). A 1-way ANOVA was performed using GraphPad Prism from log transformed data.  
1008 **(E-F)** FACS analysis of CFW and WGA-Alexa 488 stained cells. WT, *cbi1 $\Delta$*  and *cbi1 $\Delta$ <sup>C-WT</sup>* complemented cells  
1009 were cultivated as described in (A) **(E)** WGA-Alexa 488 staining histogram representation of the FACS  
1010 analysis depicted in Fig 3. **(F)** CFW-staining histogram representation of FACS analysis depicted in Fig3. **(G)**  
1011 Minimal inhibitory concentration (MIC) analysis of Caspofungin during copper sufficiency. WT, *cbi1 $\Delta$*  and  
1012 *cbi1 $\Delta$ <sup>C-WT</sup>* complemented cells were grown in 96-well liquid cultures in SC media supplemented with 0 to  
1013 100  $\mu$ g/mL Caspofungin. OD<sub>600</sub> were measured after 24h growth at 30°C and the OD<sub>600</sub> of the non-treated  
1014 condition was set to 1. Presented is the mean +/- SEM of 4 independent experiments.



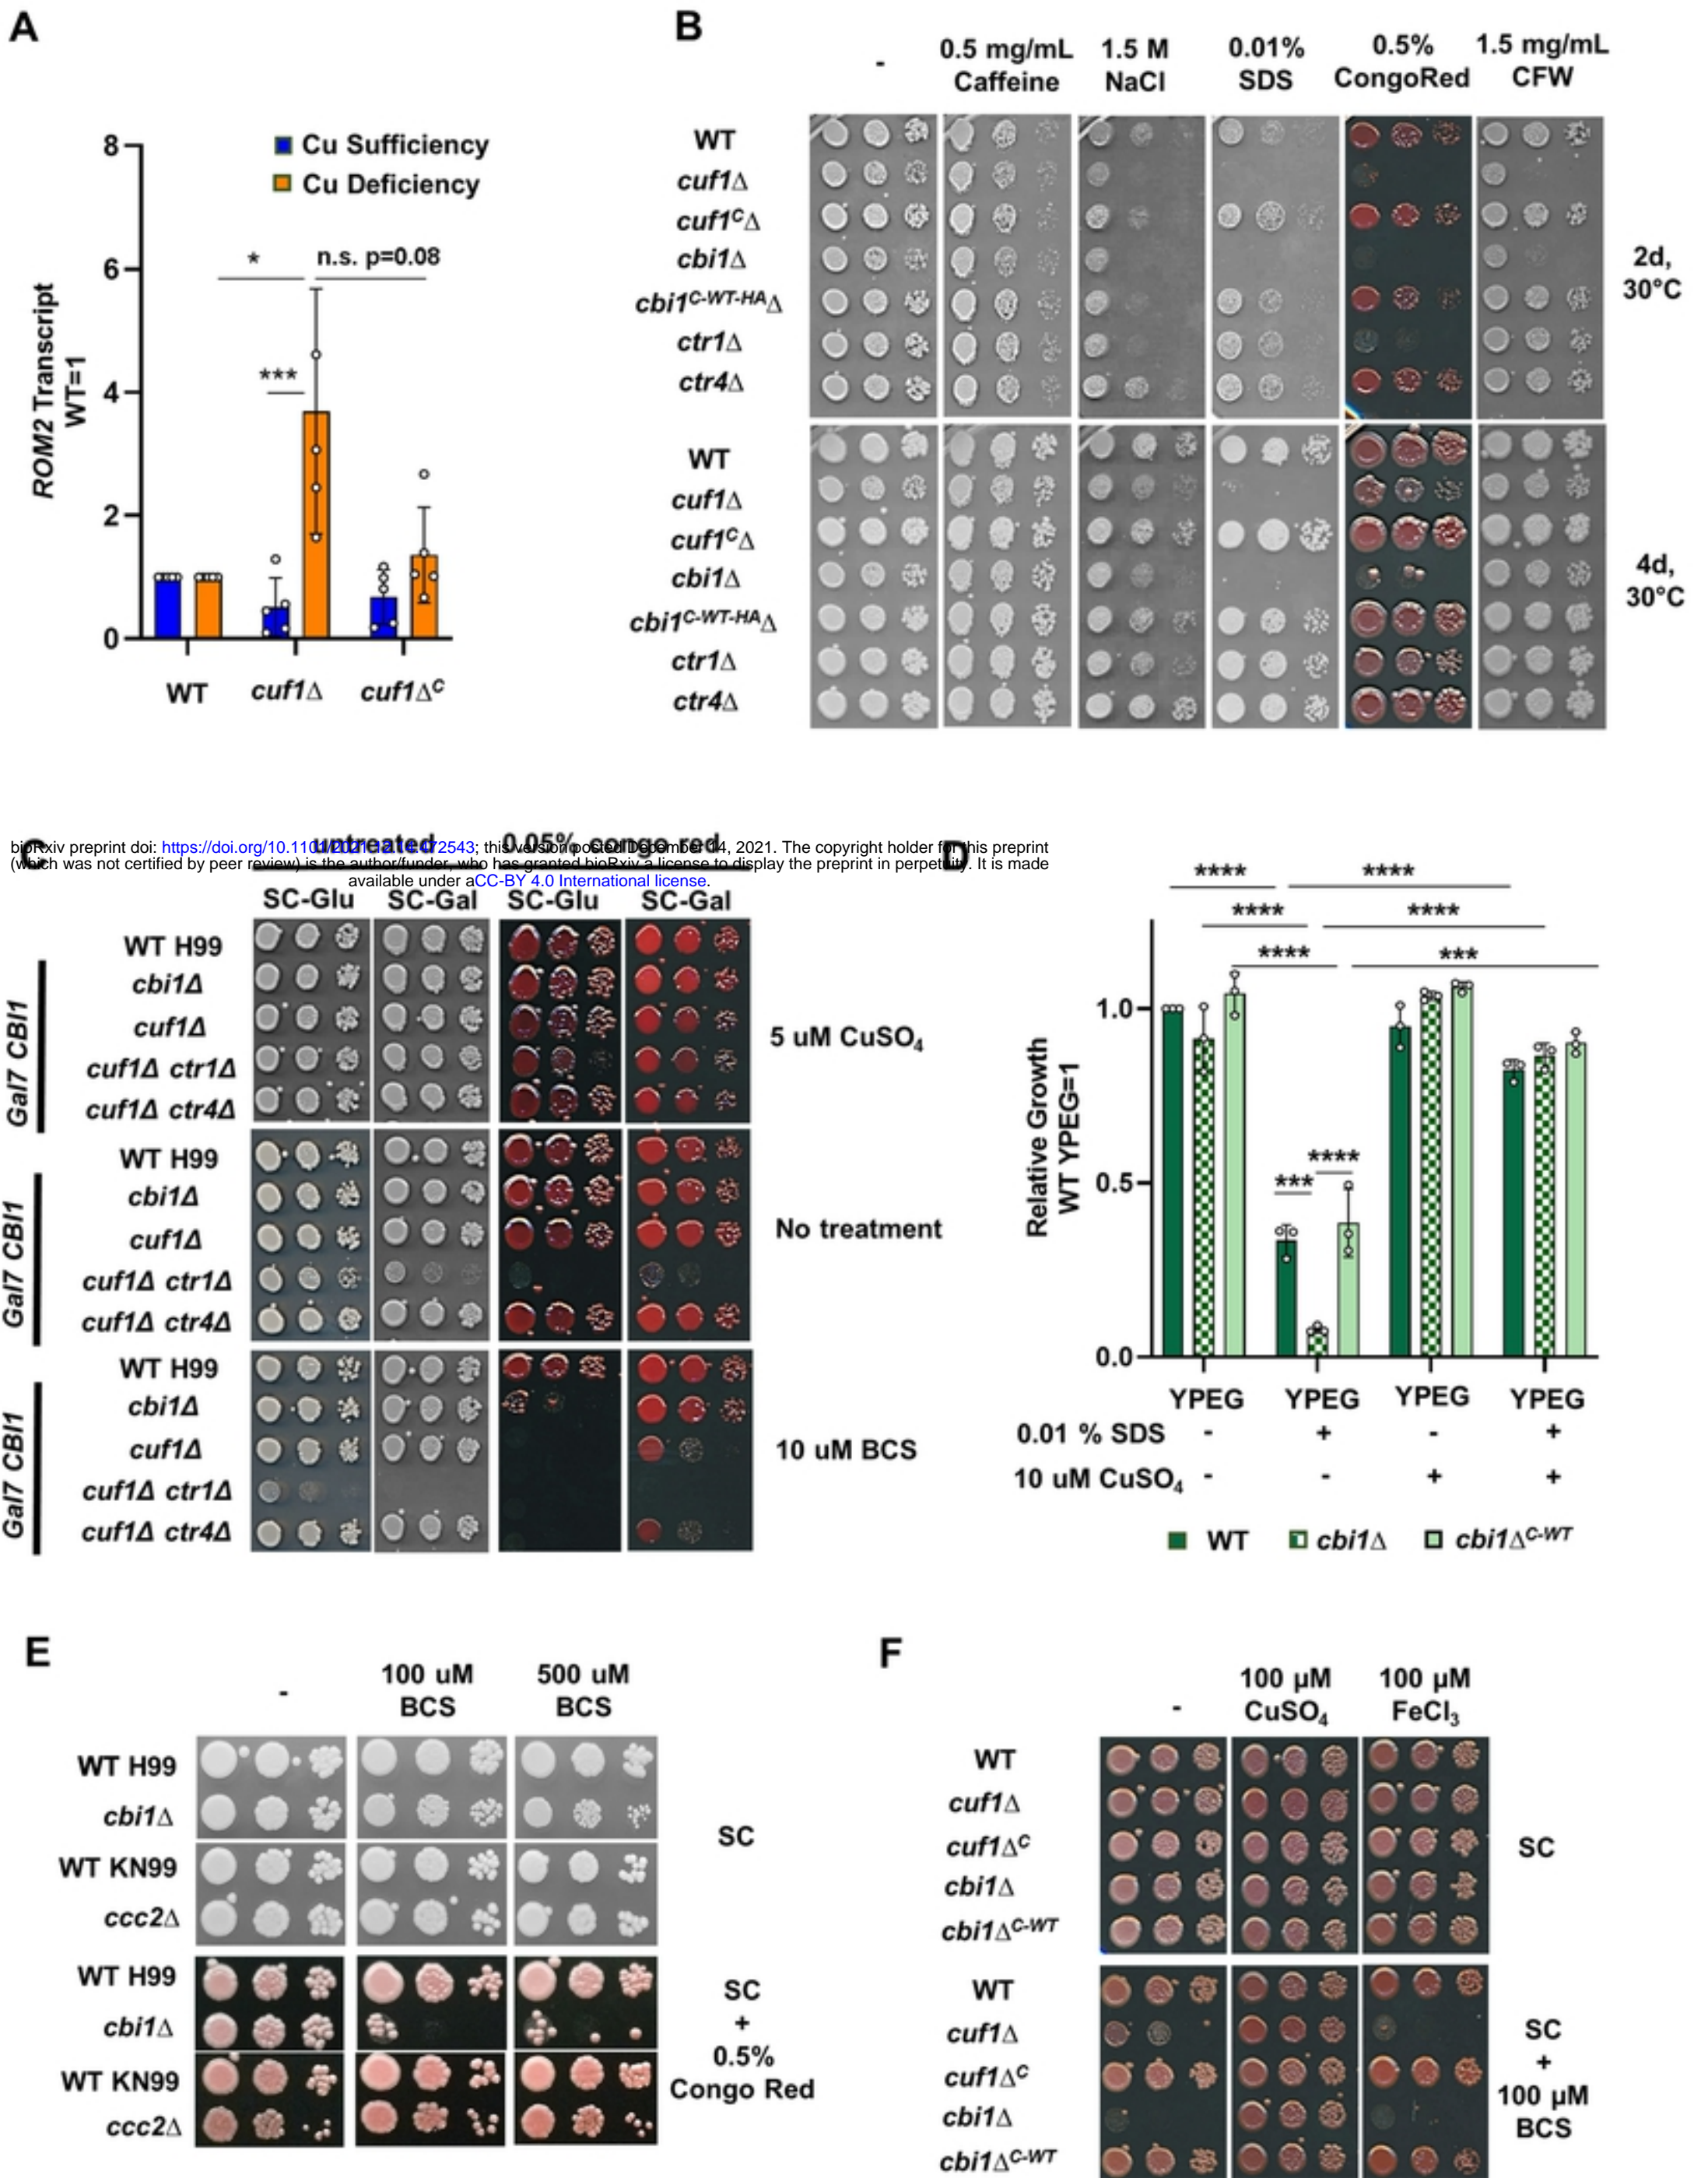

Figure 1

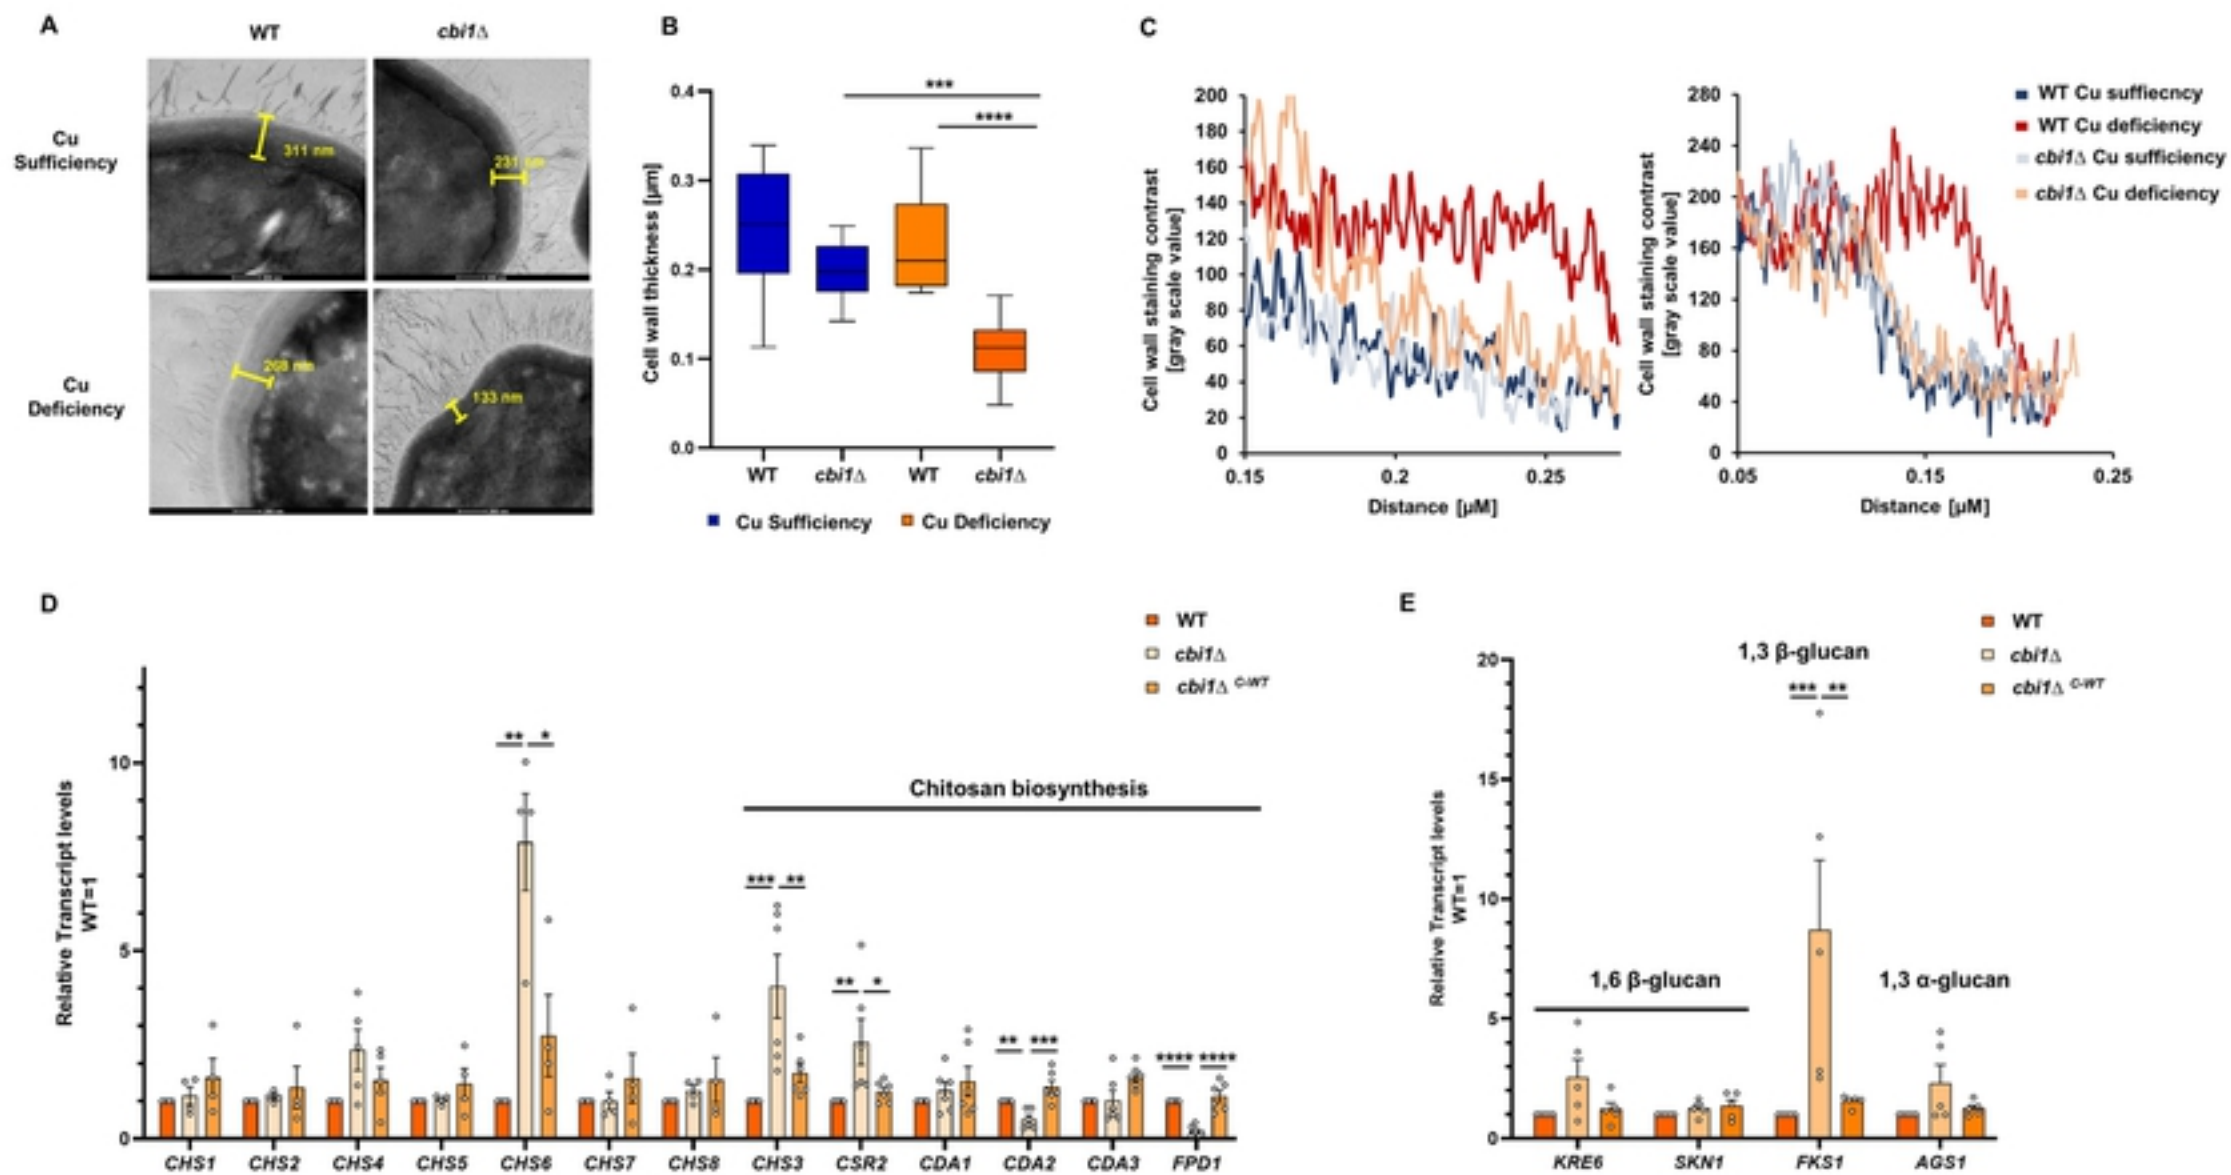

Figure 2

Figure 2



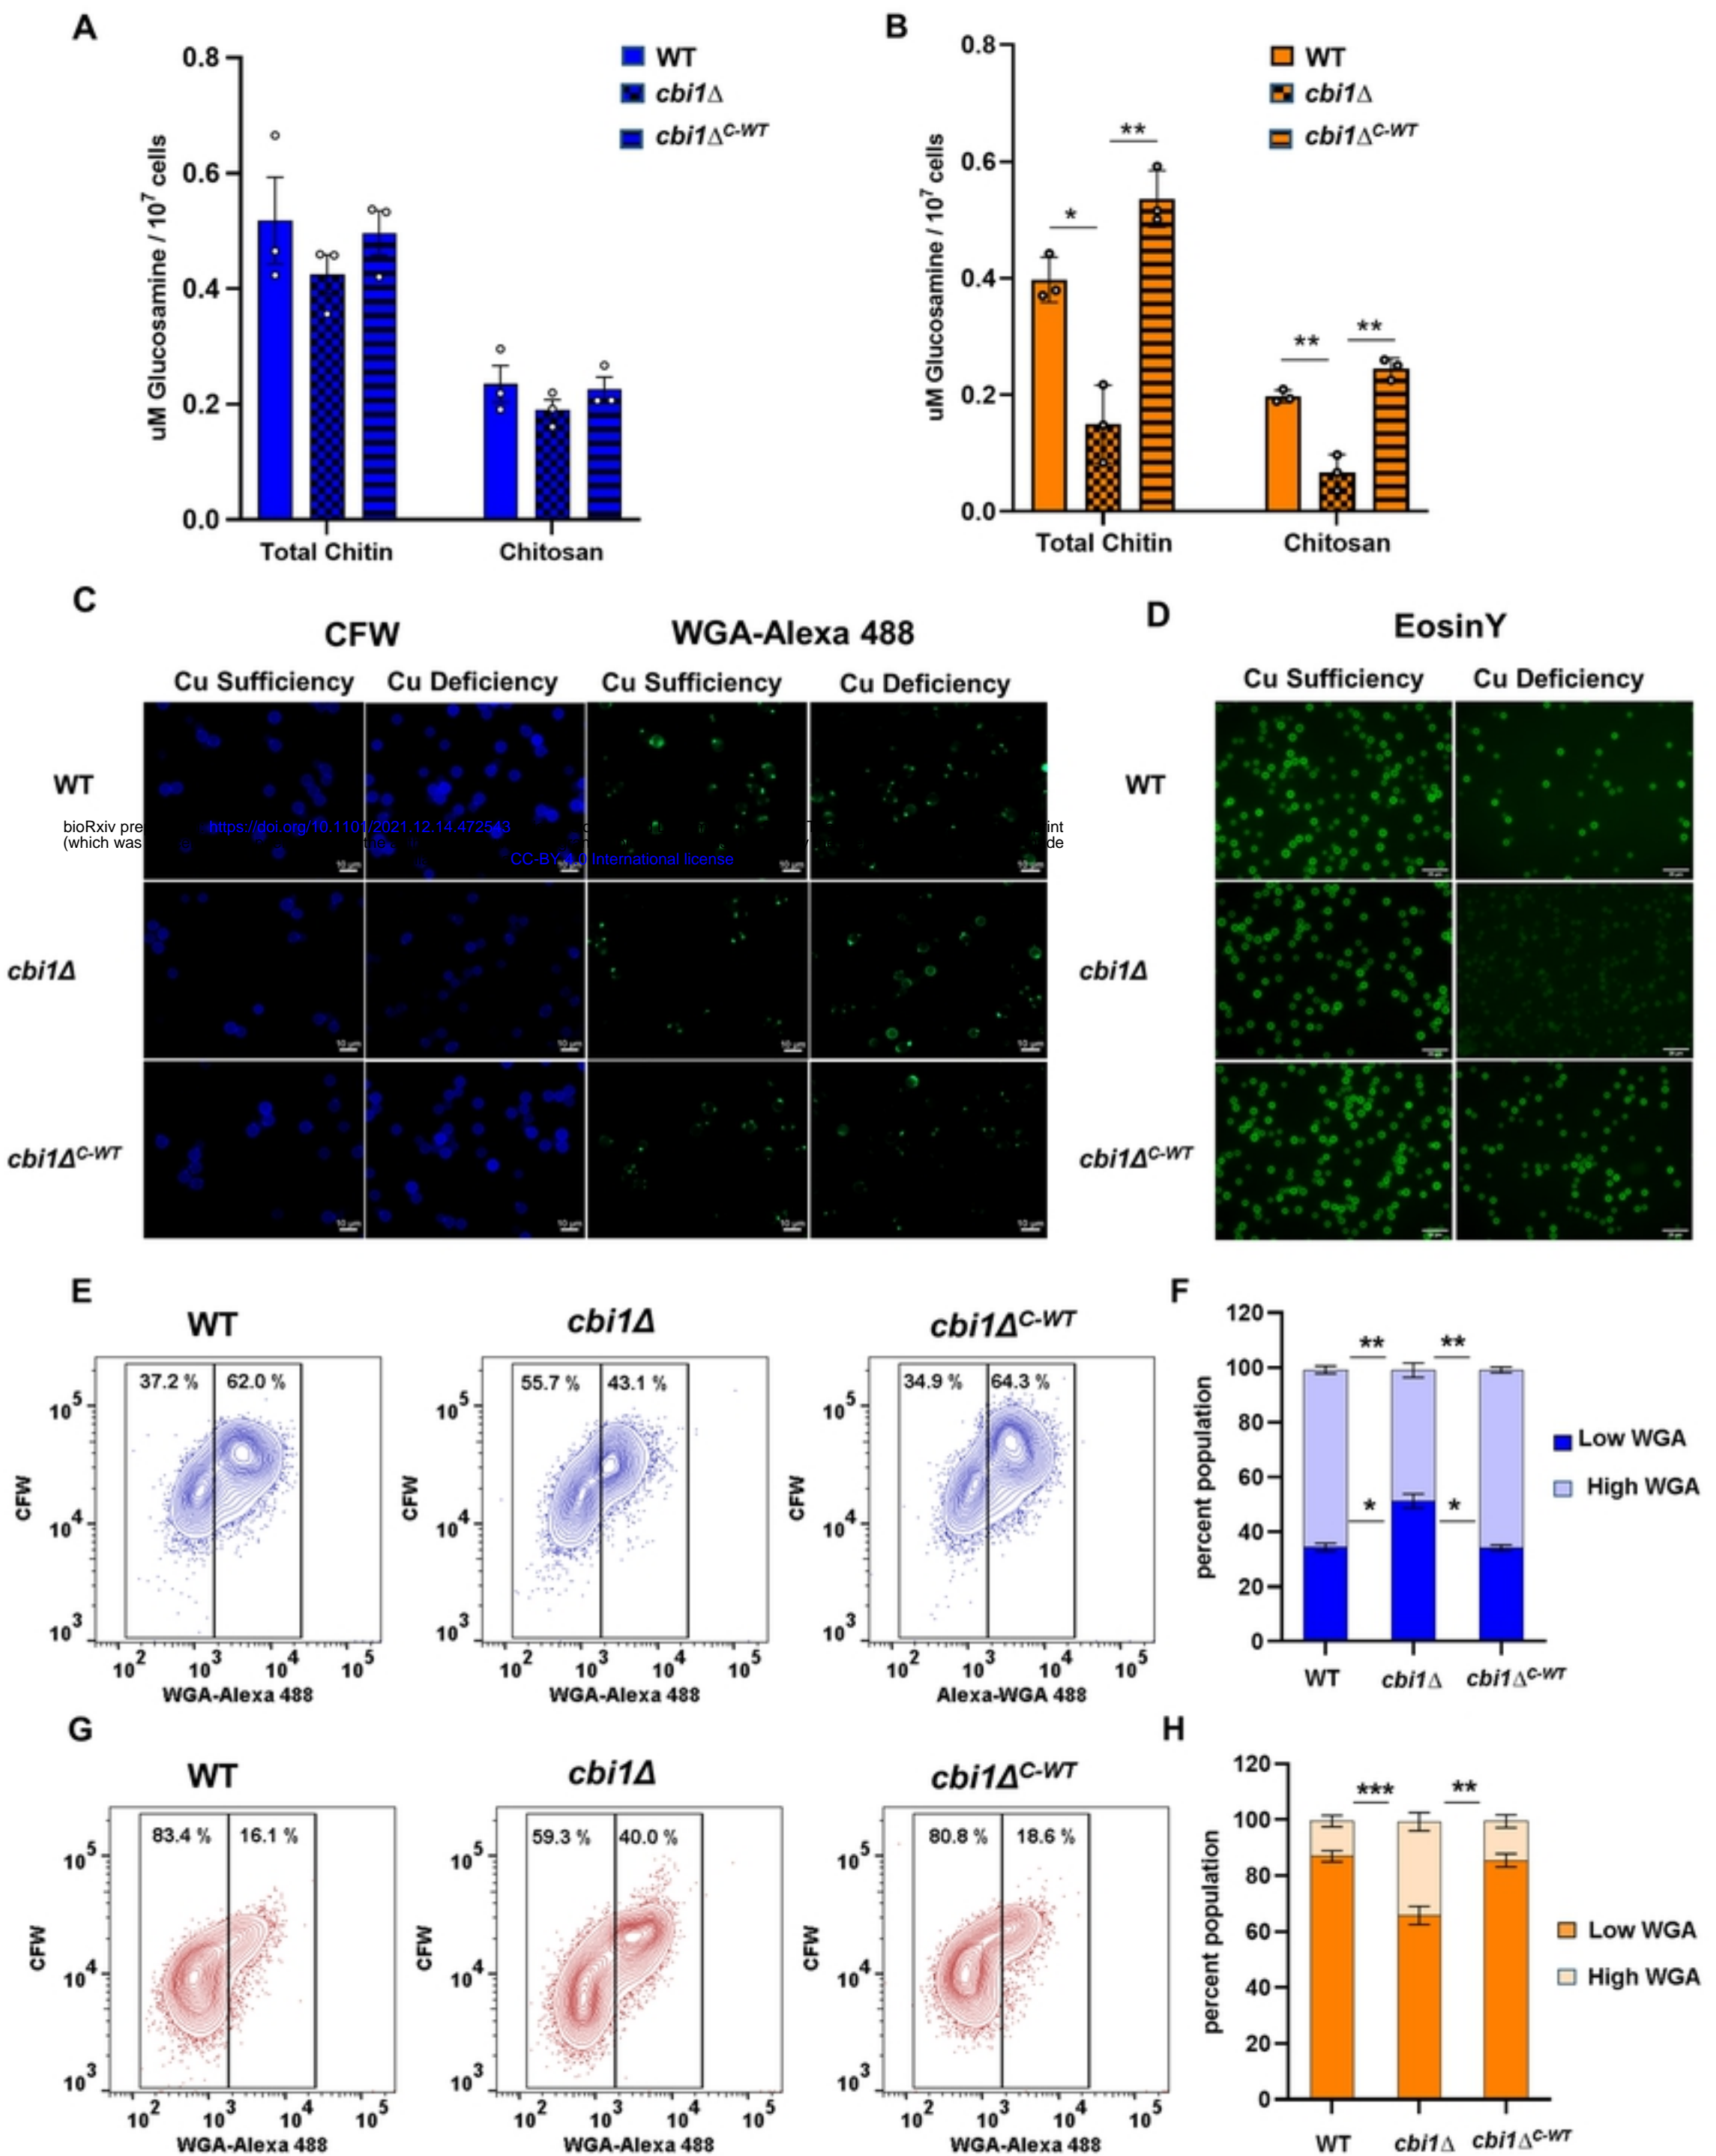

Figure 3

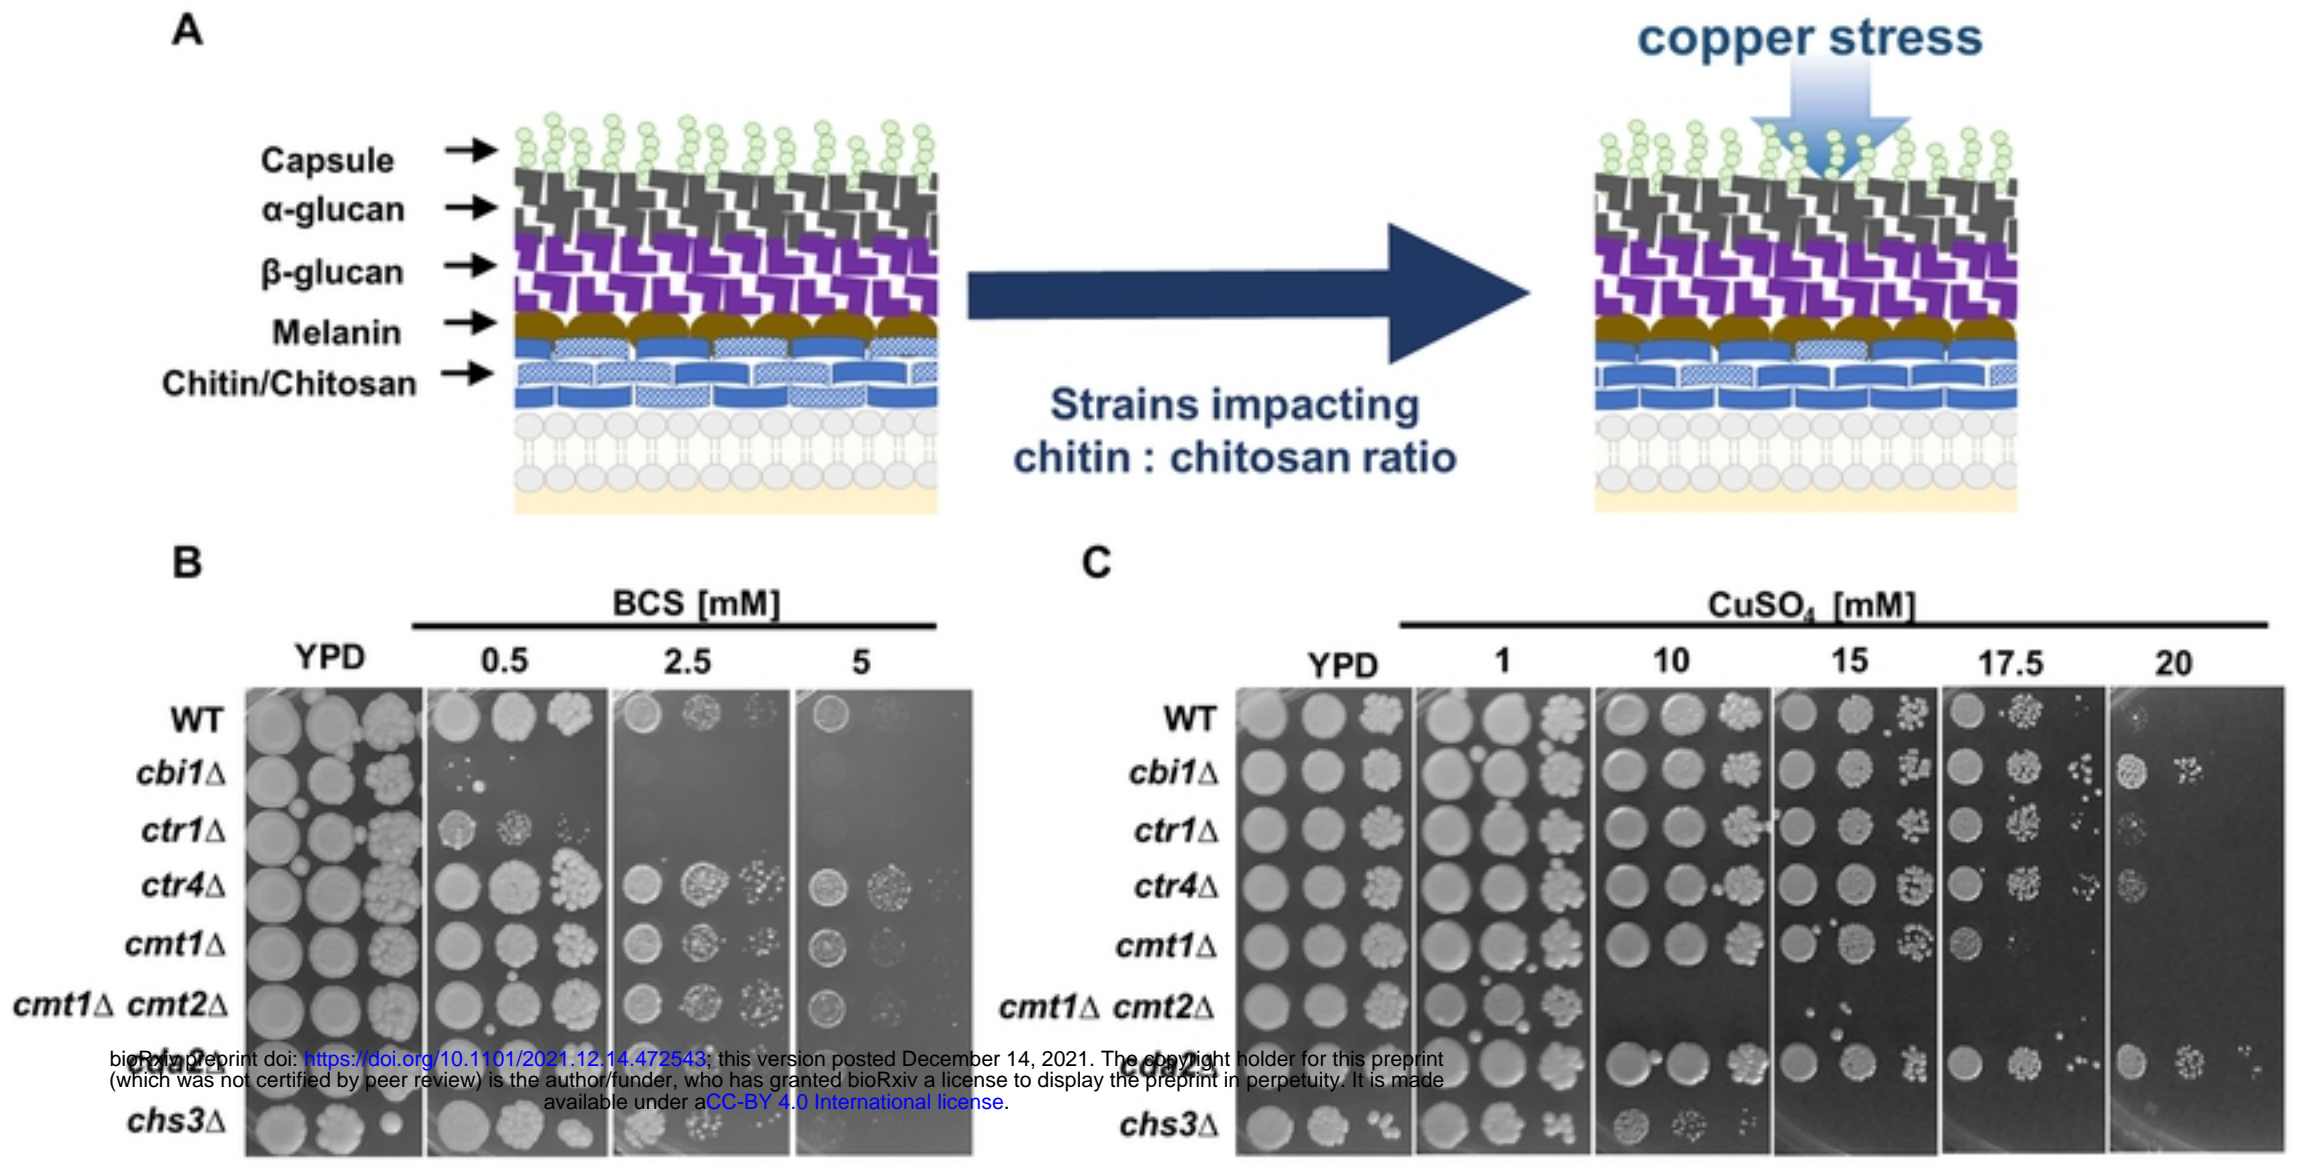

Figure 4



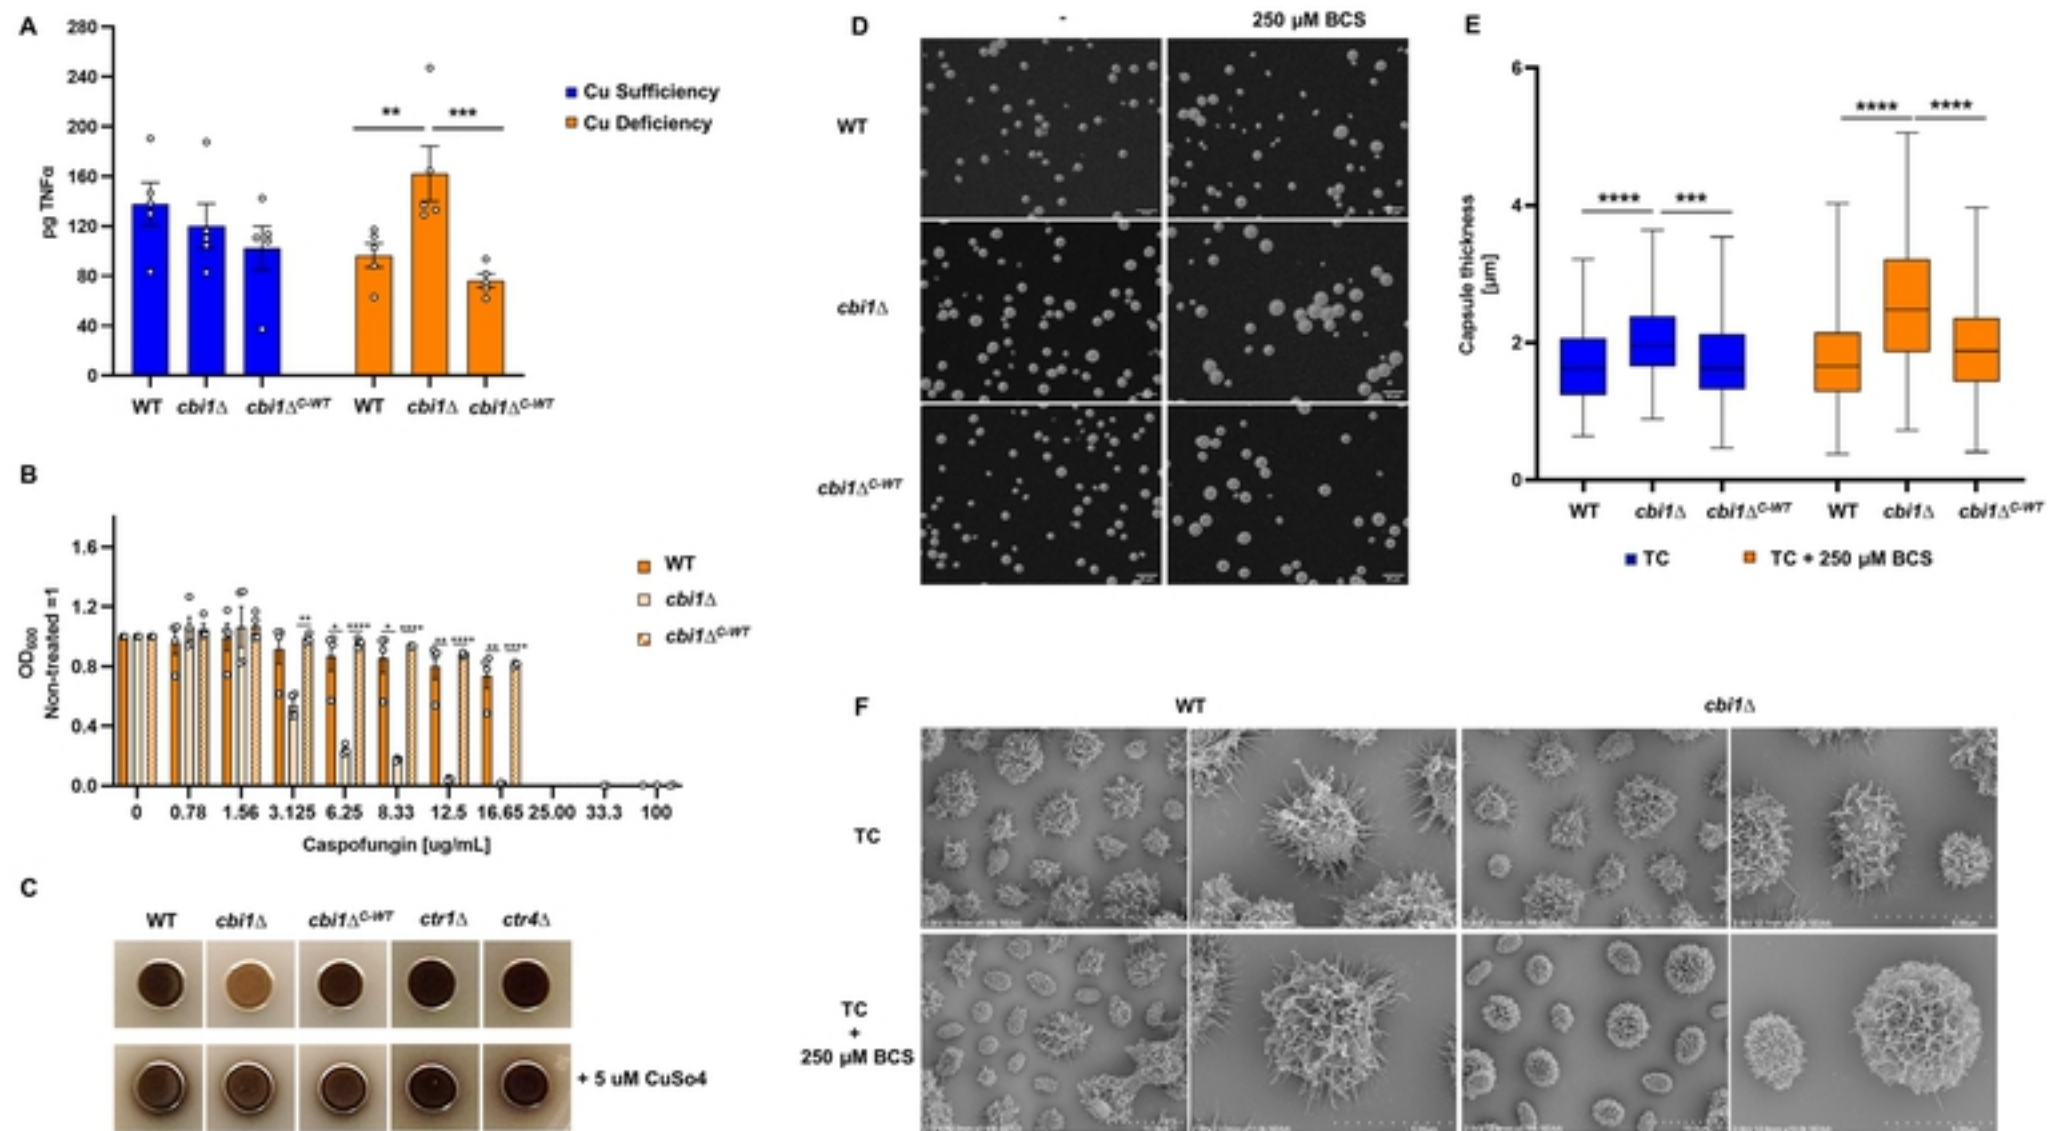

Figure 5
